1  
2  
3  
4  
5  
6  
7  
8  
9  
10  
11  
12  
13  
14  
15  
16  
17  
18  
19

**Title:** Genomic analyses underpin the feasibility of concomitant genetic improvement of milk yield and mastitis resistance in dairy sheep

Georgios Banos<sup>1,2,3</sup>, Emily L. Clark<sup>2</sup>, Stephen J. Bush<sup>2,4</sup>, Prasun Dutta<sup>2</sup>, Georgios Bramis<sup>3</sup>, Georgios Arsenos<sup>3</sup>, David A. Hume<sup>2,5</sup> and Androniki Psifidi<sup>2,6</sup>

<sup>1</sup>Scotland's Rural College, Edinburgh, Easter Bush, Midlothian, EH25 9RG, UK

<sup>2</sup>The Roslin Institute, University of Edinburgh, Easter Bush, Midlothian, EH25 9RG, UK

<sup>3</sup>School of Veterinary Medicine, Aristotle University of Thessaloniki, Thessaloniki, 54124, Greece

<sup>4</sup>Nuffield Department of Clinical Medicine, University of Oxford, John Radcliffe Hospital, Headington, Oxford, OX3 9DU, UK

<sup>5</sup>Mater Research Institute-University of Queensland, Translational Research Institute, Woolloongabba, Qld 4102, Australia

<sup>6</sup>Royal Veterinary College, University of London, Hatfield, AL9 7TA, UK

\*Correspondence: Dr Androniki Psifidi

e-mail: [androniki.psifidi@roslin.ed.ac.uk](mailto:androniki.psifidi@roslin.ed.ac.uk), [apsifidi@rvc.ac.uk](mailto:apsifidi@rvc.ac.uk)

20 **Short title:** Concomitant genetic improvement of milk yield and mastitis resistance in dairy  
21 sheep

22

## 23 **Abstract**

24 Milk yield is the most important dairy sheep trait and constitutes the key genetic improvement  
25 goal via selective breeding. Mastitis is one of the most prevalent diseases, significantly  
26 impacting on animal welfare, milk yield and quality, while incurring substantial costs. Our  
27 objectives were to determine the feasibility of a concomitant genetic improvement programme  
28 for enhanced milk production and resistance to mastitis. Individual records for milk yield and  
29 four mastitis-related traits were collected monthly throughout lactation for 609 ewes of the  
30 Chios breed. All ewes were genotyped with a mastitis specific custom-made 960 single  
31 nucleotide polymorphism array. We performed genomic association studies, (co)variance  
32 component estimation and pathway enrichment analysis, and characterised gene expression  
33 levels and the extent of allelic expression imbalance. Presence of heritable variation for milk  
34 yield was confirmed. There was no significant genetic correlation between milk yield and  
35 mastitis. Environmental factors appeared to favour both milk production and udder health. Four  
36 Quantitative Trait Loci (QTLs) affecting milk yield were detected on chromosomes 2, 12, 16  
37 and 19, in locations distinct from those previously identified to affect mastitis resistance.  
38 Pathways, networks and functional gene clusters for milk yield were identified. Seven genes  
39 (*DNAJAI*, *DNAJC10*, *FGF10*, *GHR*, *HMGCSI*, *LYPLAI*, *OXCT1*) located within the QTL  
40 regions were highly expressed in both the mammary gland and milk transcriptome, suggesting  
41 involvement in milk synthesis and production. Furthermore, the expression of four genes  
42 (*DNAJC10*, *FGF10*, *OXCT1*, *EMB*) was enriched in immune tissues implying a favourable

43 pleiotropic effect or likely role in milk production during udder infection. In conclusion, the  
44 absence of genetic antagonism between milk yield and mastitis resistance suggests that  
45 simultaneous genetic improvement of both traits be achievable. The detection of milk yield  
46 QTLs with the mastitis array underpins the latter's utility as a breeding tool for the genetic  
47 enhancement of both traits.

48

## 49 **Introduction**

50 The world's commercial dairy sheep industry is primarily concentrated in Mediterranean  
51 countries and linked to local breeds; milk is mostly used to produce high quality cheeses and  
52 other dairy products. Milk yield represents more than two thirds of the total income of the dairy  
53 sheep sector [1] and, therefore, increasing milk yield is the most important and sometimes only  
54 objective of selective breeding. Milk production traits in dairy sheep are moderately to highly  
55 heritable [2, 3] and amenable to improvement with traditional selective breeding programmes  
56 based on pedigree and phenotypic data. Indeed, such programmes have been established in  
57 many sheep populations over recent decades [2, 4]. Incorporation of genomic information in  
58 some breeding programmes (e.g. French Lacaune, Spanish Churra, Italian Sarda) has led to an  
59 acceleration of the genetic improvement outcomes.

60 The Greek Chios breed is considered to be among the most productive and prolific dairy sheep  
61 breeds worldwide [5]. A traditional breeding programme for the enhancement of milk yield has  
62 been in place since year 2000 for this breed, leading to substantial improvement in this trait.  
63 However, further increases in milk yield may be achieved with the use of relevant genomic  
64 information.

65

66 Beyond simply increasing milk production, the dairy sheep industry faces challenges such as  
67 the need to offer healthy products to consumers, addressing animal welfare, and ensuring the  
68 long-term competitiveness and sustainability of the sector. Mastitis is the most prevalent and  
69 costly disease in the dairy industry due to reduced and discarded milk, early involuntary culling  
70 of animals, and veterinary services and labour costs [6, 7]. The disease also poses a potential  
71 threat of zoonosis and antimicrobial resistance if antibiotic treatment is not applied carefully  
72 [6-8]. Moreover, mastitis is a welfare concern because of associated pain, anxiety and  
73 restlessness, and upsets the normal feeding behaviour of the animals [9]. Host resistance to  
74 mastitis is a moderately heritable trait [7]. Recently, an ovine custom made mastitis specific  
75 960-SNP DNA array was built to facilitate genetic selection and improvement of animal  
76 resistance to mastitis in dairy sheep [10] [11] [12] [13]. We previously used this array in a  
77 genomic association study and detected five quantitative trait loci (QTLs) for mastitis  
78 resistance in Chios sheep [10].

79

80 In the present study, we examined the genetic and genomic relationship between milk yield  
81 and mastitis resistance in the Chios sheep, using pedigree and genomic information. The  
82 relationship between the two traits is crucial if mastitis resistance is to be included in selective  
83 breeding goals together with increased milk yield. We estimated genetic parameters and  
84 investigated whether relevant QTLs for milk yield exist in previously identified mastitis-  
85 specific genomic regions. We also performed pathway analysis and examined gene expression  
86 and allelic expression imbalance to characterise the genes located under the QTL regions in  
87 relation with milk yield and mastitis resistance.

88

## 89 **Materials and Methods**

90

### 91 **Ethical statement**

92 The study was approved by the Ethics and Research Committee of the Faculty of Veterinary  
93 Medicine, Aristotle University of Thessaloniki, Greece. Permits for access and use of the  
94 commercial farms were granted by the farm owners, who were members of the Chios Sheep  
95 Breeders' Cooperative "Macedonia". During sampling, animals were handled by qualified  
96 veterinarians. Permission to qualified veterinarians to perform milk and blood sampling was  
97 granted by the National (Greek) Legislature for the Veterinary Profession, No. 344/29-12-  
98 2000.

99

### 100 **Animals, sampling and phenotyping**

101 Animals used in the present study included 609 purebred Chios dairy ewes raised in four  
102 commercial farms in Greece. Complete pedigree data were available for these animals. Ewes  
103 were in their first or second lactation. Daily milk yield was recorded on each animal on the day  
104 of monthly visits to the farms during the first five months of lactation. The first milk yield  
105 record was obtained at least three days after lamb weaning (ca. 42 days post lambing). Total  
106 number of individual animal records collected amounted to 2,436. Animal records for clinical  
107 mastitis occurrence and three mastitis indicator traits (milk somatic cell count, California  
108 Mastitis Test score and total viable bacterial count in milk) were also collected at the time of  
109 these visits by a qualified veterinarian, as described previously [10]. The three mastitis indicator  
110 traits may capture subclinical mastitis incidences and reflect the general health status of the  
111 udder. Peripheral blood samples were taken from each ewe in 9 ml K<sub>2</sub>EDTA Vacutainer blood

112 collection tubes (BD diagnostics) by jugular venepuncture for genomic DNA extraction.

113

## 114 Genetic parameter estimation

115 Genetic parameters for milk yield were estimated using the following basic mixed model:

$$116 \quad Y_{ijkmo} = \mu + F_i + YS_j + a_1 \cdot age + L_k + \sum_{n=1}^2 b_n P_n W_m + g_o + pe_o + e_{ijkmo} \quad (1)$$

117 Where:  $Y$  = record of ewe  $o$  in week of lactation  $m$

118  $\mu$  = overall mean

119  $F$  = fixed effect of flock (farm)  $i$

120  $YS$  = fixed effect of year-season of lambing  $j$

121  $a_1$  = linear regression on age at lambing ( $age$ )

122  $L$  = fixed effect of lactation number  $k$

123  $W$  = fixed effect of week of lactation (i.e. week post-lambing)  $m$

124  $b_n$  = fixed regression coefficient on week of lactation  $m$  (order  $n=2$ )

125  $P_n$  = orthogonal polynomial of week  $m$  (order  $n=2$ )

126  $g$  = random additive genetic effect of ewe  $o$ , including pedigree genetic relationships  
127 among animals

128  $pe$  = random permanent environment effect of ewe  $o$

129  $e$  = random residual effect

130

131 Heritability and repeatability estimates were derived from the variance components calculated  
132 for the random effects in model (1). In a separate analysis, the additive genetic and permanent  
133 environment effects in model (1) were replaced by interactions of the latter with second-order  
134 polynomial functions of week of lactation. The choice of polynomial order was decided after  
135 testing sequentially increasing orders with the log-likelihood test. This analysis resulted in  
136 distinct variance component and genetic parameter estimates by week of lactation, which were  
137 then combined to derive average heritability and repeatability estimates for early (weeks of  
138 lactation 1-7), mid (weeks 8-17) and late (weeks 18-24) lactation. In addition, genetic  
139 correlations between milk yields measured at different lactation stages were calculated based  
140 on corresponding genetic covariance estimates. A smoothed lactation curve adjusted for all  
141 fixed effects in the model was also derived.

142

143 Finally, bivariate analyses of milk yield and each one of the four mastitis related traits were  
144 conducted using model (1); outcomes from these analyses were used to estimate phenotypic  
145 and genetic correlations between traits.

146 All statistical analyses in the present study were conducted with ASReml v4.0 [14].

147

## 148 **Genomic association studies**

149 DNA was extracted from blood buffy coat as described previously [15].

150 All animals were genotyped with a customised mastitis specific 960 SNP DNA array containing  
151 SNPs located on chromosomes 2, 3, 5, 12, 16 and 19. Briefly, this array was built based on  
152 QTLs for mastitis resistance found to segregate in multiple different dairy sheep breeds. For the

153 design of this custom-made array, SNPs were selected from 50K and 800K SNP ovine DNA  
154 arrays, as well as available re-sequencing data. The average density of the array was 1 SNP  
155 every 23 Kb (for more details see [10]). This genomic tool was built within an FP7 European  
156 research project ([http://cordis.europa.eu/result/rcn/163471\\_en.html](http://cordis.europa.eu/result/rcn/163471_en.html)). Genotypes at each SNP  
157 locus were subjected to quality control measures using the following thresholds: minor allele  
158 frequency  $>0.05$ , call rate  $>95\%$  and Hardy-Weinberg equilibrium  $P > 10^{-4}$ . After quality control,  
159 710 SNP markers remained for further analysis.

160

161 Possible population stratification was investigated with the use of the genomic relationship  
162 matrix among individual animals. This matrix was converted to a distance matrix that was then  
163 used to conduct multidimensional scaling analysis using the GenABEL package of R [16].

164

165 Individual ewe phenotypes were residuals resulted after fitting a model that included all fixed  
166 effects of model (1); thus, phenotypic records were adjusted for all these environmental effects.  
167 Separate phenotypes were derived for the entire lactation (overall) and for each lactation stage  
168 (early, mid, late) as described above. In all cases, GEMMA v0.94.1 [17] was used to conduct  
169 genomic association analyses based on a mixed model that included the genomic relationship  
170 matrix among individual ewes as a polygenic effect. After Bonferroni correction for multiple  
171 testing, the significance threshold for nominal  $P=0.05$  was set at  $P=7.04 \times 10^{-5}$  and a suggestive  
172 threshold (accounting for one false positive per genome scan) was set at  $P=1.41 \times 10^{-3}$ .

173

174 Statistically significant SNPs from the genomic association analyses were further examined  
175 with a mixed model that included the fixed effects of model (1), the fixed effect of the SNP



176 genotype and the random effect of the animal including the pedigree relationship matrix.  
177 Additive (a) and dominance (d) effects, and the proportion of additive genetic variance due to  
178 each SNP locus (pVA) were calculated as follows:

179 
$$a = (AA-BB)/2$$

180 
$$d = AB - ((AA+BB)/2)$$

181 
$$pVA = (2pq (a+d (q-p))^2)/VA$$

182 where AA, BB and AB were the marginal means of the respective genotype, p and q the  
183 corresponding frequencies of alleles A and B at the SNP locus, and VA the estimated additive  
184 genetic variance, derived with model (1). All analyses were conducted with ASReml v4.0 [14].

185

186 Linkage disequilibrium (LD) among significant SNPs was calculated based on the  $r^2$  value  
187 using PLINK v1.9 [18]. Blocks of LD in regions harbouring significant SNPs were visualised  
188 using Haploview v4.2 [19].

189

190 All significant (post-Bonferroni correction) and suggestive SNPs identified in the genomic  
191 analysis for milk yield were mapped to the reference genome and annotated using the variant  
192 effect predictor (<http://www.ensembl.org/Tools/VEP>) tool within the Ensembl database and  
193 the Oar v3.1 assembly. Moreover, genes located around (0.5 Mb windows upstream and  
194 downstream) the significant markers -in the candidate regions for milk yield- were annotated  
195 using the BioMart data mining tool (<http://www.ensembl.org/biomart/martview/>) and the Oar  
196 v3.1 assembly.

197

## 198 **Pathway and functional enrichment analysis**

199 The list of annotated genes located within the QTL regions for milk yield were analysed with  
200 the Ingenuity Pathway Analysis (IPA) programme ([www.ingenuity.com](http://www.ingenuity.com)) in order to identify  
201 canonical pathways and gene networks constructed by the products of these genes. IPA  
202 constructs multiple possible upstream regulators, pathways and networks which may be  
203 associated with the biological mechanism underlying the studied trait. The analysis is based on  
204 data from large-scale causal networks derived from the Ingenuity Knowledge Base. IPA then  
205 infers the most suitable pathways and networks based on their statistical significance, after  
206 correcting for a baseline threshold [20]. The IPA score in the constructed networks can be used  
207 to rank these networks based on the P-values obtained using Fisher's exact test (IPA score or  
208  $P\text{-score} = -\log_{10}(P \text{ value})$ ).

209

210 The list of candidate genes was also analysed against an *Ovis aries* background using the  
211 Database for Annotation, Visualization and Integrated Discovery (DAVID) [21] to examine  
212 gene set enrichment. We determined the corresponding gene ontology terms and performed  
213 functional annotation clustering analysis to detect gene enrichment. The enrichment score  
214 calculated by the DAVID software package is a modified Fisher's exact test P-value; an  
215 enrichment score greater than unity reflects over-representation of the respective functional  
216 category.

217

## 218 **Gene expression analysis**

219 Genes contributing to milk production are likely to be expressed in milk somatic cells,  
220 mammary gland, and other organs such as the liver and kidney that provide nutrients and  
221 regulate the electrolytes needed for lactosynthesis and the production of milk. We also reasoned  
222 that the expression of genes with pleiotropic effects would be associated with both milk yield  
223 and resistance to mastitis, and/or expressed in both mammary gland and immune related  
224 tissues. To assess the expression profiles of genes located in the candidate regions for milk  
225 yield, we obtained publicly available data from an RNA-seq characterisation of the milk  
226 transcriptome of two Spanish dairy sheep breeds, Churra and Assaf, where milk somatic cells  
227 of eight individual sheep (four from each breed) had been sampled throughout lactation at 10,  
228 50, 120 and 150 days after lambing [22, 23]. Individual milk yield and milk somatic cell count  
229 records were also available for the sheep used in the latter study [23]. To supplement this data,  
230 we used publicly available RNA-Seq data from a high-resolution atlas of gene expression  
231 across tissues and cell types from all major organ systems in sheep [24, 25]. The sheep gene  
232 expression atlas, which includes 437 RNA-Seq libraries was produced using six Texel x  
233 Scottish Blackface sheep [24]. An additional 83 RNA-Seq libraries from a Texel trio (ewe,  
234 lamb and ram) were included in the sheep gene expression atlas [25]. We extracted data  
235 pertaining to the mammary glands, liver and kidneys. Since we were interested in detecting  
236 genes related to both milk yield and mastitis, we also extracted the expression level of the genes  
237 under consideration in immune-related tissues, specifically hemolymph nodes, mesenteric,  
238 popliteal, prescapular and submandibular lymph nodes, peripheral blood mononuclear cells,  
239 blood leukocytes, monocyte-derived macrophages, bone marrow derived macrophages,  
240 alveolar macrophages, and tonsils.

241

242 Expression levels for all samples, were estimated using Kallisto v0.42.4 [26]. Expression was  
243 reported for each protein-coding transcript as the number of transcripts per million, and then

244 summarised to the gene-level (as in [27]). Heatmaps were drawn using the heatmap.2 function  
245 of the R package gplots v3.0.1, in order to demonstrate expression enrichment in the different  
246 tissues and lactation stages.

247

248 The relationship of the expression level of each gene in the milk transcriptome with milk yield  
249 and milk somatic cell count was assessed in the Spanish sheep data using the following linear  
250 model:

$$251 \quad Y_{ij} = \mu + B_i + g_j + e_{ij} \quad (2)$$

252 where  $Y$  = record of ewe (milk yield or milk somatic cell count),  $\mu$  = overall mean,  $B$  = fixed  
253 effect of breed  $i$ ,  $g$  = fixed effect of the mean expression of gene  $j$ ,  $e$  = random residual effect.

254

255 The nominal significance threshold in this analysis was set at  $P=0.05$ . Since genes were located  
256 within four QTL regions, an FDR adjustment for multiple testing was applied, setting the  
257 significance threshold at  $P=0.0167$ . These analyses were conducted with ASReml v4.0 [14].

258 To identify significant expression differences amongst genes located in the milk yield  
259 candidate regions in sheep with low, medium and high milk somatic cell count we performed  
260 Tukey's Test using the statistical package R v3.0.1.

261

## 262 **Variant calling and allelic expression imbalance analysis**

263 Much of the genetic variation in genes that control a quantitative trait is likely to affect their  
264 transcriptional regulation. In fact, many quantitative traits associated with altered gene

265 expression, and trait-associated loci are enriched for eQTLs (Nicolae et al., 2010). If an  
266 individual is heterozygous for a *cis*-acting mutation it is expected that the two alleles of the  
267 gene will be expressed unequally causing allelic expression imbalance. Measuring the relative  
268 expression levels of two alleles using RNA-Seq may lead to the identification of *cis*-acting  
269 SNPs or haplotypes [28-31]. To identify any *cis*-QTLs affecting the genes located in the  
270 candidate regions for milk yield we obtained the raw RNA-Seq data for mammary gland  
271 tissue from three adult female Texel x Scottish Blackface sheep from the sheep gene  
272 expression atlas [24]. The aligner HISAT2 (v2.0.4) [32], was used to produce the BAM files  
273 as previously described [24]. Variants were called using BCFtools [33] mpileup (v1.4) with  
274 parameters --max-depth 1000000 --min-MQ 60, followed by BCFtools call (v1.4) with  
275 parameters -m (allow multiallelic variants) and -v (variant only). The minimum MAPQ  
276 (mapping quality) score was chosen to focus on uniquely mapped reads for variant calling.  
277 The resulting VCF file contained both SNPs and indels. The exonic variants of the protein  
278 coding genes located in the milk yield candidate regions were obtained from each VCF file  
279 using the program GTF\_Extract (v0.9.1) ([https://github.com/fls-bioinformatics-](https://github.com/fls-bioinformatics-core/GFFUtils/blob/master/docs/GTF_extract.rst)  
280 [core/GFFUtils/blob/master/docs/GTF\\_extract.rst](https://github.com/fls-bioinformatics-core/GFFUtils/blob/master/docs/GTF_extract.rst)) and BEDtools [34] intersect (v2.25.0)  
281 based on gene annotations from Ovis\_aries.Oar\_v3.1. The putative functional impact of each  
282 variant on the encoded proteins was predicted using SnpEff v4.3 [35] with the parameter --  
283 onlyProtein (only annotate protein-coding variants). BCFtools norm (v1.4) with parameter --  
284 d was used to remove duplicated VCF records that arose due to duplicated exon coordinates  
285 in the GTF file (that is, exons present in more than one transcript). Finally, VCFs from each  
286 animal were filtered to obtain only biallelic heterozygous SNPs, using BCFtools 'view'  
287 (v1.4). For the allelic expression imbalance analysis we focused on biallelic heterozygous  
288 exonic SNPs, since the non-exonic variants may signify transcriptional noise in mRNA  
289 sequencing and contribute potential errors in the analysis.

290 Read counts for both the reference and alternate allele were obtained using allelecounter v0.6  
291 (<https://github.com/secastel/allelecounter>) with parameters --min\_cov 4, --min\_baseq 20 and  
292 --min\_mapq 60 and --max\_depth 10000. Allelic expression imbalance, per gene, was  
293 estimated using MBASED (Meta-analysis Based Allele-Specific Expression Detection) [36]  
294 with parameters isPhased=FALSE, numSim=10<sup>6</sup>, BPPARAM=SerialParam(). MBASED  
295 allelic expression imbalance estimates were derived by combining information across  
296 individual heterozygous SNP within a gene. Only variants with >10 reads in either reference  
297 or alternate allele were used. We retained only those genes with Benjamin-Hochberg [37]  
298 adjusted P-value  $\leq 0.05$  and major allele frequency  $\geq 0.7$ .

299

## 300 **Results**

301

### 302 **Descriptive statistics**

303 An average daily milk yield of 1,912 grams (g) was produced in the studied sheep population  
304 with a standard deviation of 713 g, a maximum of 4,597 g and a minimum of 210 g. As  
305 expected, milk yield decreased as lactation progressed [38].

306

### 307 **Genetic parameters**

308 Estimates of heritability and repeatability of milk yield (Table 1) were derived for the entire  
309 lactation as well as different stages of lactation defined as early, mid and late. Statistically  
310 significant ( $P < 0.05$ ) moderate trait heritabilities (0.19-0.28) and repeatabilities (0.69-0.76)

311 were estimated across all lactation stages. Moreover, the genetic correlations between milk  
312 yield in different lactation stages were significantly ( $P<0.05$ ) positive. However, the genetic  
313 correlation between early and late lactation was moderate (0.60) and significantly less than one.  
314 In practical terms, lactation onset, peak lactation and lactation persistence may have partly  
315 separate genetic control. Genetic correlations between milk and mastitis traits were not  
316 significantly different from zero ( $P>0.05$ ). Negative phenotypic correlations were observed  
317 between these traits ( $P<0.05$ ), indicative of favourable environmental effects to both  
318 production and health (Table 2).

**Table 1.** Heritability ( $h^2$ ) and repeatability ( $r$ ) estimates of daily milk yield in Chios sheep by lactation stage and across the entire lactation; standard errors in parentheses.

| <b>Parameter</b>        | <b>Early lactation<br/>(1-7 weeks)</b> | <b>Mid lactation<br/>(8-17 weeks)</b> | <b>Late lactation<br/>(18-24 weeks)</b> | <b>Overall<br/>lactation</b> |
|-------------------------|----------------------------------------|---------------------------------------|-----------------------------------------|------------------------------|
| <b><math>h^2</math></b> | 0.28 (0.06)                            | 0.19 (0.06)                           | 0.23 (0.06)                             | 0.23 (0.06)                  |
| <b><math>r</math></b>   | 0.76 (0.02)                            | 0.69 (0.02)                           | 0.71 (0.02)                             | 0.71 (0.02)                  |

319

320

321

322

323

**Table 2.** Estimates of phenotypic and genetic correlations between milk yield and four mastitis traits in Chios sheep; standard errors in parentheses.

| <b>Mastitis trait</b> | <b>Phenotypic correlation</b> | <b>Genetic correlation</b> |
|-----------------------|-------------------------------|----------------------------|
| <b>SCC</b>            | -0.18 (0.04)*                 | -0.12 (0.14)               |
| <b>CMT</b>            | -0.18 (0.04)*                 | -0.12 (0.13)               |
| <b>TVC</b>            | -0.10 (0.03)*                 | -0.11 (0.14)               |
| <b>CM</b>             | -0.07 (0.04)                  | -0.09 (0.19)               |

SCC: milk somatic cell count, CMT: California Mastitis Test score, TVC: total bacterial count in milk, CM: clinical mastitis occurrence; \*Significantly different from zero ( $P < 0.05$ )

324

## 325 **Genomic association studies**

326 Separate genomic association analyses were conducted for milk yield in early, mid, late and  
327 overall lactation. Multidimensional scaling analysis of the studied population revealed no  
328 substructure. In general, similar genomic associations were detected for milk yield in middle,  
329 late and overall lactation but distinct associations were observed in early lactation. We  
330 identified a genome-wide significant association after Bonferroni correction for multiple  
331 testing on chromosome 19 ( $P = 1.28 \times 10^{-5}$ ) and three suggestive associations on chromosomes  
332 2 ( $P = 4.30 \times 10^{-4}$ ), 12 ( $P = 3.65 \times 10^{-4}$ ) and 16 ( $P = 6.07 \times 10^{-4}$ ). Details of SNPs associated  
333 with milk yield are shown in Table 3. Manhattan plots and corresponding Q-Q plots displaying  
334 genomic association results are shown in Fig. 1 and Fig. 2, respectively.

335



**Table 3.** List of Single Nucleotide Polymorphisms (SNPs) associated with milk yield in Chios sheep.

| Lactation stage          | SNP                 | Chr (position) | P-value  | Add(P-value) | Dom(P-value) | pVA  | p    | q    |
|--------------------------|---------------------|----------------|----------|--------------|--------------|------|------|------|
| <b>Early 1-7 weeks</b>   | OAR12_23075585      | 12(20050780)   | 3.35E-04 | 0.07(0.09)   | 0.07(0.10)   | 0.01 | 0.62 | 0.38 |
|                          | oar3_OAR12_19689222 | 12(19689222)   | 3.65E-04 | 0.05(0.36)   | 0.12(0.03)   | 0.01 | 0.73 | 0.27 |
|                          | oar3_OAR12_19269103 | 12(19269103)   | 4.66E-04 | -0.03(0.33)  | 0.05(0.02)   | 0.01 | 0.73 | 0.27 |
|                          | oar3_OAR12_19500329 | 12(19500329)   | 6.98E-04 | 0.08(0.02)   | 0.02(0.64)   | 0.02 | 0.6  | 0.4  |
|                          | oar3_OAR12_19624437 | 12(19624437)   | 6.77E-04 | 0.05(0.30)   | 0.09(0.10)   | 0.01 | 0.72 | 0.28 |
|                          | oar3_OAR12_19840123 | 12(19840123)   | 9.80E-04 | 0.04(0.30)   | 0.08(0.10)   | 0.01 | 0.68 | 0.32 |
|                          | oar3_OAR16_33078067 | 16(33078067)   | 6.07E-04 | -0.09(0.00)  | 0.20(0.05)   | 0.05 | 0.96 | 0.04 |
| <b>Middle 8-17 weeks</b> | OAR19_25259444      | 19(23804520)   | 7.03E-05 | -0.15 (0.00) | 0.05 (0.25)  | 0.16 | 0.48 | 0.52 |
|                          | oar3_OAR19_24119431 | 19(24119431)   | 9.03E-04 | -0.14(0.00)  | -0.02(0.53)  | 0.15 | 0.48 | 0.52 |
|                          | OAR19_25513179      | 19(24010793)   | 1.70E-03 | -0.15(0.00)  | -0.01(0.77)  | 0.16 | 0.58 | 0.42 |
|                          | OAR16_34906481      | 16(32156238)   | 1.35E-03 | -0.08(0.02)  | 0.07(0.05)   | 0.05 | 0.90 | 0.10 |
|                          | OAR2_133418483      | 2(125230366)   | 1.48E-03 | 0.08(0.51)   | -0.10(0.44)  | 0.06 | 0.92 | 0.08 |
|                          | OAR2_133088440      | 2(124907852)   | 2.28E-04 | 0.23(0.00)   | 0.19(0.03)   | 0.05 | 0.82 | 0.18 |
|                          | oar3_OAR2_124936445 | 2(124936445)   | 1.11E-03 | 0.12(0.06)   | 0.07(0.30)   | 0.03 | 0.78 | 0.22 |
| <b>Late 18-24 weeks</b>  | OAR19_25259444      | 19(23804520)   | 1.41E-04 | -0.15(0.00)  | -0.02(0.57)  | 0.14 | 0.48 | 0.52 |
|                          | oar3_OAR19_24745933 | 19(24745933)   | 2.24E-04 | 0.10(0.00)   | -0.10(0.00)  | 0.07 | 0.54 | 0.46 |
|                          | OAR19_25830151      | 19(24342061)   | 1.35E-03 | 0.07(0.07)   | -0.00(0.87)  | 0.02 | 0.72 | 0.28 |
|                          | oar3_OAR19_24707843 | 19(24707843)   | 7.91E-04 | -0.13(0.00)  | -0.09(0.03)  | 0.06 | 0.64 | 0.36 |
|                          | oar3_OAR19_23656789 | 19(23656789)   | 6.29E-04 | -0.11(0.00)  | -0.06(0.11)  | 0.07 | 0.52 | 0.48 |
|                          | oar3_OAR2_124936445 | 2(125000000)   | 5.76E-04 | 0.11(0.02)   | -0.00(0.93)  | 0.05 | 0.78 | 0.22 |
|                          | OAR2_133088440      | 2(124907852)   | 4.30E-04 | 0.19(0.00)   | 0.09(0.18)   | 0.06 | 0.82 | 0.18 |
| <b>Overall</b>           | OAR19_25259444      | 19(23804520)   | 1.28E-05 | -0.14(0.00)  | -0.00(0.84)  | 0.12 | 0.48 | 0.52 |
|                          | oar3_OAR19_24032312 | 19(24032312)   | 2.70E-04 | -0.11(0.00)  | -0.08(0.03)  | 0.05 | 0.6  | 0.4  |
|                          | oar3_OAR19_24707843 | 19(24707843)   | 2.90E-04 | -0.12(0.00)  | -0.07(0.04)  | 0.06 | 0.64 | 0.36 |
|                          | OAR19_25513179      | 19(24010793)   | 4.16E-04 | -0.11(0.00)  | -0.06(0.07)  | 0.06 | 0.58 | 0.42 |
|                          | oar3_OAR19_24119431 | 19(24119431)   | 4.90E-04 | -0.11(0.00)  | -0.09(0.01)  | 0.08 | 0.48 | 0.52 |
|                          | oar3_OAR19_23929524 | 19(23929524)   | 5.62E-04 | 0.11(0.00)   | -0.03(0.29)  | 0.07 | 0.48 | 0.52 |
|                          | oar3_OAR19_24745933 | 19(24745933)   | 9.80E-04 | 0.10(0.00)   | -0.05(0.15)  | 0.06 | 0.54 | 0.46 |
|                          | oar3_OAR19_23891277 | 19(23891277)   | 1.17E-03 | -0.10(0.00)  | -0.05(0.13)  | 0.05 | 0.54 | 0.46 |
|                          | oar3_OAR19_23656789 | 19(23656789)   | 1.46E-03 | -0.10(0.00)  | -0.05(0.15)  | 0.06 | 0.52 | 0.48 |
|                          | OAR2_133088440      | 2(124907852)   | 9.55E-04 | 0.20(0.00)   | 0.12(0.06)   | 0.05 | 0.82 | 0.18 |
|                          | OAR2_133418483      | 2(125230366)   | 1.47E-03 | 0.10(0.30)   | -0.08(0.43)  | 0.05 | 0.92 | 0.08 |

P-value: P-value from genomic association study; additive allele substitution effect (ADD) and corresponding P-value; dominance effect (DOM) and corresponding P-value; pVA: proportion of the genetic variance explained by the SNP; p and q allelic frequencies

337 **Fig 1. Manhattan plots displaying the genomic association results for milk yield in Chios**  
338 **sheep.** Manhattan plots for milk yield in early (A), mid (B), late (C), and overall (D) lactation.  
339 Genomic location is plotted against  $-\log_{10}(P)$ . Red and blue lines, respectively, are thresholds  
340 for significance post-Bonferroni correction ( $P < 0.05$ ) and for suggestive significance  
341 (accounting for one false positive per genome scan).

342 **Fig 2. Q-Q plots displaying the genomic association results for milk yield in Chios sheep.**  
343 Q-Q plots in early (A), mid (B), late (C) and overall (D) lactation; observed  $P$ -values are plotted  
344 against the expected  $P$ -values.

345

346

347 The significance of the above SNP markers was confirmed in mixed model analyses based on  
348 the pedigree genetic relationship matrix. The additive and dominance genetic effects, and the  
349 proportion of the total genetic variance explained by each of these SNPs in the corresponding  
350 lactation stage are summarised in Table 3. Most SNPs had a significant additive effect and a  
351 few a significant dominance effect on milk yield. The significant SNPs in the QTL region on  
352 chromosome 19 accounted for 16% of the additive genetic variance, while collectively all the  
353 SNPs in the four candidate regions accounted for 30% of the additive genetic variance of milk  
354 yield. When located on the same chromosomes, the significant markers identified for milk yield  
355 were in linkage disequilibrium ( $LD=0.27-0.97$ ), implying that they correspond to the same  
356 causative mutation (S1 Table). The significant SNPs identified in the present study were not in  
357 LD with the SNPs previously associated with the mastitis related traits in Chios sheep [10] (S1  
358 Table). Only small LD blocks were visualised with Haploview, probably due to a high number  
359 of recombination events having taken place in the outbred population of study. All significant  
360 SNP markers were located in intergenic or intronic regions. The candidate QTL regions for  
361 milk yield contained a relatively small number of protein-coding genes ( $n=31$ ) and microRNAs  
362 ( $n=6$ ) (S2 Table).

363

## 364 **Pathway and functional clustering analysis**

365 The genes located in the candidate regions for milk yield were enriched for pathways involved  
366 in electrolyte (Na<sup>+</sup>, K<sup>+</sup>, and H<sup>+</sup>) transport and homeostasis, lipid metabolism (ketolysis,  
367 ketogenesis) and oxidative stress, as well as innate immune responses (Fig. 3). Moreover, two  
368 networks of molecular interactions were constructed, one of which was related with  
369 immunological disease and cell signalling and interaction, and another with the development,  
370 function and organ morphology of the endocrine and reproductive systems (Fig. 4).

371 **Fig 3. Pathway analysis using the IPA software.** The most highly represented canonical  
372 pathways derived from genes located within the studied candidate regions for milk yield in  
373 Chios sheep. The solid yellow line represents the significance threshold. The line joining  
374 squares represents the ratio of the genes within each pathway to the total number of genes in  
375 the pathway.

376 **Fig 4. Network analysis using the IPA software.** Two gene networks illustrating the  
377 molecular interactions between candidate gene products: (I) network related to immunological  
378 disease and cell signalling and interaction; (II) network related to the endocrine system  
379 development and function, reproductive system development and function, and organ  
380 morphology. Arrows with solid lines represent direct interactions and arrows with broken lines  
381 represent indirect interactions. Genes with white labels are those added to the IPA analysis  
382 because of their interaction with the target gene products.

383

384 The functional annotation clustering analysis showed that genes were organised into two  
385 clusters associated with the regulation of cellular processes (enrichment score =1.60) and  
386 metabolic processes (enrichment score =1.04). Both clusters contained the same genes

387 (*CNTN4, DNAJ1, ESRRG, FGF10, FRZB, GHR, HMGCS1, OXCT1, TGFB2*).

388

## 389 **Gene expression analysis**

390 Fourteen of the genes located in the candidate regions for milk yield (*CCL28, DNAJC10,*  
391 *DUSP19, EMB, FGF10, GHR, LYPLAL1, NNT, HMGCS1, NCKAP1, NUP35, OXCT1, PAIP1*  
392 and *ZNF131*) were expressed in either the milk transcriptome or the mammary gland (S1-3  
393 Figs). The growth hormone receptor (*GHR*) and 3-oxoacid CoA transferase 1 (*OXCT1*) genes  
394 were highly expressed in liver and kidney cortex tissue, respectively (S2 Fig). Five of the  
395 candidate genes (*DNAJC10, EMB, HMGCS1, OXCT1, PAIP1*) detected in tissues related to  
396 milk production (mammary gland, liver and kidney cortex) were also up-regulated in immune  
397 related tissues, relative to the other tissues analysed (S3 Fig). The *EMB* gene in particular  
398 exhibited a strong immune-specific profile with a high level of expression in macrophages  
399 relative to the other tissues (S2 Fig).

400

401 Expression of genes *LYPLAL, PARP8, RRP15* and *TGFB2* had a suggestive (nominal  $P < 0.05$ )  
402 association with milk yield in the Churra and Assaf sheep data that did not remain significant  
403 after the FDR correction.

404

405 A subset of five genes (*EMB, FGF10, DNAJC10, OXCT1, PARP8*) had a suggestive (nominal  
406  $P < 0.05$ ) association with milk somatic cell count in the Churra and Assaf sheep data. The  
407 expression level of two of these genes, *EMB* and *FGF10*, were also significantly different

408 between sheep with high and low somatic cell count in milk (Tukey's Test; *EMB*:  $P=0.001648$ ;  
409 *FGF10*:  $P=0.002085$ ).

410

## 411 **Allelic expression imbalance analysis**

412 Exonic single nucleotide variation (SNP and indels) was observed in 24 of the protein coding  
413 genes located in the candidate regions for milk yield. Missense variants were identified in  
414 several genes including, *CNTN4*, *DNAJC1*, *DUSP19*, *GHR*, *HMGSI*, *MRPS30*, *NNT*, *NUP35*  
415 and *RRP15* genes. One-sampled MBASED analysis identified two genes, *CCL28* ( $P= 1.8e-05$ )  
416 and *RRP15* ( $P= 3e-03$ ) with significant allelic expression imbalance. Specifically, seven SNPs  
417 in the 3' UTR region of *CCL28* (major allele frequency 0.72) and two synonymous SNPs in  
418 *RRP15* (major allele frequency 0.71) were detected exhibiting allelic expression imbalance (S3  
419 Table). However, these results should be interpreted with caution since allelic expression  
420 imbalance in both genes was evident in only one of the three individual sheep.

421

## 422 **Candidate genes**

423 Based on all above results, a total of seven genes (*DNAJAI*, *DNAJC10*, *FGF10*, *GHR*,  
424 *HMGCSI*, *LYPLAI*, *OXCTI*) were selected as candidate genes for milk yield located in mastitis  
425 genomic regions (Table 4). Genes were selected using a combination of their known biological  
426 function, involvement in relevant pathways and networks, enrichment in tissues relevant to  
427 milk production, and any previously known association with milk production in either dairy  
428 sheep or other species.

429

**Table 4.** Selected candidate genes for milk yield.

| <b>Gene Symbol</b> | <b>Gene name</b>                           | <b>Genomic location</b> | <b>Function</b>                                                                                                                                                                                                                                                                                                                                                                                                                                                                                                                 |
|--------------------|--------------------------------------------|-------------------------|---------------------------------------------------------------------------------------------------------------------------------------------------------------------------------------------------------------------------------------------------------------------------------------------------------------------------------------------------------------------------------------------------------------------------------------------------------------------------------------------------------------------------------|
| <i>DNAJC10</i>     | DnaJ Heat Shock Protein (Hsp40) Member C10 | 2: 125867867-125913602  | Required for efficient folding of proteins in the endoplasmic reticulum by catalysing the removal of non-native disulfide bonds formed during the folding of proteins, such as LDLR [39, 40].                                                                                                                                                                                                                                                                                                                                   |
| <i>LYPLAL1</i>     | Lysophospholipase-Like 1                   | 12: 20785849-20814579   | Hydrolyses fatty acids from S-acylated cysteine residues in proteins such as trimeric G alpha proteins or HRAS. Has depalmitoylating activity toward KCNMA1 and low lysophospholipase activity [41].                                                                                                                                                                                                                                                                                                                            |
| <i>FGF10</i>       | Fibroblast Growth Factor 10                | 16: 30468674 - 30562188 | This gene encodes a protein which is part of a family of proteins called fibroblast growth factors that are involved in important processes such as cell division, regulation of cell growth and maturation, formation of blood vessels, wound healing, and development before birth. By attaching to another protein known as a receptor, the FGF10 protein triggers a cascade of chemical reactions inside the cell that signals the cell to undergo certain changes, such as maturing to take on specialised functions [42]. |
| <i>GHR</i>         | Growth Hormone Receptor                    | 16: 31832933 - 32000445 | This gene encodes a member of the type I cytokine receptor family, which is a transmembrane receptor for growth hormone.                                                                                                                                                                                                                                                                                                                                                                                                        |

|               |                                                  |                         |                                                                                                                                                                                                                                                                                                      |
|---------------|--------------------------------------------------|-------------------------|------------------------------------------------------------------------------------------------------------------------------------------------------------------------------------------------------------------------------------------------------------------------------------------------------|
|               |                                                  |                         | Binding of growth hormone to the receptor leads to receptor dimerization and the activation of an intra- and intercellular signal transduction pathway leading to growth. Variation in this gene can affect glucose, lipid and insulin-like growth factor-I metabolism [43].                         |
| <i>HMGCS1</i> | 3-Hydroxy-3-Methylglutaryl-CoA Synthase 1        | 16: 31409643 - 31430541 | This enzyme condenses acetyl-CoA with acetoacetyl-CoA to form HMG-CoA, which is the substrate for HMG-CoA reductase [44].                                                                                                                                                                            |
| <i>OXCT1</i>  | 3-Oxoacid CoA Transferase 1                      | 16: 32617427-32779330   | Key enzyme for ketone body catabolism. The encoded protein is a homodimeric mitochondrial matrix enzyme that plays a central role in extrahepatic ketone body catabolism by catalysing the reversible transfer of coenzyme A from succinyl-CoA to acetoacetate [45].                                 |
| <i>DNAJ1</i>  | DnaJ Heat Shock Protein Family (Hsp40) Member A1 | 19: 23692565-23720861   | This gene encodes a member of the DnaJ protein family, which act as heat shock protein 70 cochaperones and facilitates protein folding, trafficking, prevention of aggregation, and proteolytic degradation. Stimulates ATP hydrolysis and plays a role in protein transport into mitochondria [46]. |

430

## 431 Discussion

432 The existence of a mastitis-specific ovine DNA array built on previously detected markers



433 associated with mastitis resistance in dairy sheep opens up opportunities for targeted genomic  
434 and marker-assisted selection aiming to enhance animal resistance to the disease. The aim of  
435 the present study was to investigate the association of this array with milk yield of dairy sheep  
436 and assess the feasibility of a concomitant genetic improvement programme for the two traits.  
437 Chios sheep were used as a study model.

438

439 According to our results, milk yield and mastitis traits in the Chios sheep are not genetically  
440 correlated to each other. Genetic correlation estimates between milk somatic cell count and  
441 milk yield are reportedly antagonistic in dairy cattle [47] but inconsistent amongst previous  
442 sheep studies ranging from antagonistic [48] to favourable [3]. Our findings for the Chios sheep  
443 indicate that selection for enhanced mastitis resistance could be incorporated into the current  
444 genetic improvement programme without incurring adverse effects on milk yield.

445 An overall moderate but significant heritability for milk yield was estimated in Chios sheep,  
446 consistent with the dairy sheep literature (ranging from 0.16 to 0.30) as reviewed in [49] and  
447 previous studies in Chios sheep ranging from 0.21 to 0.29 [50].

448

449 Genomic analyses conducted here revealed several SNPs on the mastitis array with a significant  
450 effect on milk yield. These milk-associated SNPs were not in LD with genomic regions found  
451 previously to affect mastitis resistance in the same population [10]. For example, the QTL for  
452 milk yield on chromosome 2 was 75 Mb distant from the one previously identified for mastitis  
453 resistance on the same chromosome [10]. The association of this QTL region with milk yield  
454 is supported by results of a previous genomic selection mapping study that compared dairy  
455 with meat sheep breeds to identify genomic regions for milk traits under selection [51]. In that

456 study a highly homozygous region was detected in both Chios and Churra sheep in close  
457 proximity with our QTL region on chromosome 2 [51]. Furthermore, the QTL for milk yield  
458 on chromosome 12 identified in the present study was located within a previously identified  
459 QTL region for milk yield in East Friesian X Dorset cross sheep [52]. No QTLs for mastitis  
460 resistance have been identified on this chromosome in Chios sheep [10]. The QTLs on  
461 chromosome 19 and 16 identified in the present study were also independent from those  
462 previously identified for mastitis resistance on the same chromosomes in the Chios sheep; the  
463 latter were located 2-4 Mb away and were in zero LD with the milk-associated region of the  
464 present study. QTLs for milk yield, and milk protein and fat content have been also identified  
465 on chromosome 16 in Churra sheep [53], in close proximity with the QTL identified here in  
466 Chios sheep. To the best of our knowledge, the QTL on chromosome 19 is reported here for  
467 the first time. These results are also consistent with a previous study of Chios sheep [54],  
468 suggesting that a relatively major locus might be involved in ovine milk production. The QTL  
469 identified on chromosome 19 in the present study explained 16% of the genetic variance.  
470 Furthermore, the significant SNP markers identified for milk yield in our study collectively  
471 explained over 30% of the genetic variance of the trait, suggesting that the mastitis-specific  
472 targeted array can also be used for genomic selection to enhance milk yield.

473

474 In the QTL regions identified for milk yield on chromosomes 2 and 19 there are two candidate  
475 genes, *DNAJAI* and *DNAJC10*, both belonging to the same gene family. In the previous milk  
476 transcriptome study of the Churra and Assaf breeds, two other related genes, *DNAJAA4* and  
477 *DNAJB2*, were reported as functional candidates for milk yield [55]. The *DNAJ* family of  
478 proteins regulate ATP hydrolysis activity, and facilitate protein folding, trafficking, prevention  
479 of aggregation and proteolytic degradation; *DNAJAI* functions as a co-chaperone and protects  
480 cells against apoptosis in response to cellular stress [56], while *DNAJC10* promotes apoptosis

481 in response to endoplasmic reticulum stress. Therefore, these two genes might affect milk yield  
482 through both metabolism and mammary apoptosis; the latter has been associated negatively  
483 with lactation persistency (daily milk yield decline in late lactation stages) in dairy species [57].

484

485 Some of the candidate genes for milk yield identified in the present study have been previously  
486 reported in dairy cattle. For example, 3-oxoacid CoA transferase 1 (*OXCT1*) has been  
487 associated favourably with both milk production [58] and mastitis resistance [59], and has been  
488 suggested to regulate mammary gland metabolism and milk synthesis during mastitis infection  
489 in dairy cattle [60]. Using the gene expression atlas for sheep and the milk transcriptome  
490 dataset, *OXCT1* was found to be expressed in both mammary gland and immune tissues, and  
491 highly expressed in the kidney cortex indicating that it may play a similar role in sheep. Growth  
492 hormone receptor (*GHR*) has been previously associated with increased milk yield and reduced  
493 milk somatic cell count in several dairy cattle studies [60-64]. Selective sweeps were also  
494 identified in the *GHR* region when dairy with beef cattle were compared [65]. In the present  
495 study, *GHR* was expressed in the mammary gland and the milk transcriptome, and was highly  
496 expressed in liver, relative to the other tissues sampled for the sheep gene expression atlas  
497 (<http://biogps.org/sheepatlas>). Furthermore, fibroblast growth factor 10 (*FGF10*) and 3-  
498 Hydroxy-3-Methylglutaryl-CoA Synthase 1 (*HMGSC1*) genes have been previously associated  
499 with milk production in dairy cattle [61, 66]. The pleiotropic growth factor *FGF10* is  
500 reportedly required for mammary gland development in mice [67]. In sheep, this gene was  
501 highly expressed in the mammary gland and female reproductive tissues including the uterus  
502 and placenta (<http://biogps.org/sheepatlas>). In the present study, *FGF10* was found to be  
503 differentially expressed in sheep with different milk somatic cell counts, suggesting a possible  
504 role in mastitis resistance. Our pathway analysis showed that the products of genes *GHR*,  
505 *FGF10*, *HMGSC1* are part of a network related with the development, function and organ

506 morphology of the endocrine and reproductive systems. However, further studies are needed  
507 to confirm the relevance of this network with milk production and identify the causative genes  
508 and mutations.

509

510 Allelic expression imbalance was detected in the epithelia-associated chemokine (C-C motif)  
511 ligand 28 (*CCL28*) and ribosomal RNA processing 15 (*RRP15*) genes in mammary gland  
512 tissue. The *CCL28* gene encodes a protein that has been previously reported to demonstrate  
513 direct antimicrobial activity against mastitis infection in dairy cattle [68] and in humans [69-  
514 71]. This gene is upregulated during pregnancy and lactation, and considered vital for the  
515 ability of IgA-producing B cells to migrate to the mammary tissue during lactation [71]. In the  
516 present study, *CCL28* was expressed highly in the milk somatic cells but not in immune tissues  
517 implying a protective role mainly in the mammary gland, as has been shown in humans [69,  
518 70]. The *RRP15* gene plays a role in cell cycle, cell proliferation and apoptosis [72]. Both these  
519 genes are linked to protective immunity and, as such, are likely to be under strong selection  
520 pressure. The two variants detected in *PPR15* were synonymous SNPs and, therefore, less  
521 likely to be relevant to gene function. The seven variants in 3' UTR of *CCL28* could be more  
522 relevant to the genetic/transcriptional control of *CCL28* expression, since the turnover of  
523 mRNA is mostly regulated by *cis*-acting elements located in the 3'UTR regions [73].  
524 Therefore, these SNPs might affect the corresponding phenotypic trait in sheep, possibly by  
525 disrupting miRNA binding as in the myostatin example from Texel sheep described in [74].  
526 Further analysis using the miRWalk database [75] predicted that one of the SNPs on  
527 chromosome 16 (31362143 bp) that exhibited allelic expression imbalance is located within a  
528 microRNA binding site, in the 3' UTR of *CCL28*. Interestingly, the same microRNA (bta-mir-  
529 29e) in dairy cattle has been already reported to be differentially expressed in bovine mastitis  
530 caused by gram positive bacteria [76]. However, further studies are needed to confirm this,

531 since allelic expression imbalance in the two genes was identified in only one of the three  
532 individual sheep studied, implying this might be simply due to individual specific variation in  
533 expression. A wider analysis across multiple tissues would also help to determine if the allelic  
534 expression imbalance observed in the present study is indeed specific to genes associated with  
535 the mammary gland. Further studies could also investigate the relevance of the SNPs exhibiting  
536 allelic imbalance to gene function and quantify allelic expression imbalance in a wider subset  
537 of animals, preferably including animals of the Chios breed.

538

539 In conclusion, results of the present study suggest that genetic selection for enhanced host  
540 resistance to mastitis will not antagonise milk yield in Chios sheep. Therefore, a genetic  
541 improvement programme for enhancing both mastitis resistance and milk production is feasible  
542 for this breed. In addition, there are QTLs within the mastitis specific DNA array that may be  
543 used to further increase milk production with genomic selection. Genes within genomic regions  
544 associated with ovine milk production exhibited tissue-specific expression patterns and  
545 pathways similar to those observed in cattle indicating that the underlying genetic mechanisms  
546 are likely to be, at least partially, conserved between the two species. Moreover, several  
547 candidate genes were highly expressed in immune tissues and in milk implying a favourable  
548 pleiotropic effect or likely role in milk production during udder infection. These genes are  
549 suitable candidates for further investigation to determine if they can be exploited in breeding  
550 programmes for concomitant improvement of milk production and mastitis resistance or as  
551 novel therapeutics.

552

553 **Competing interests**

554 The authors declare that they have no competing interests regarding the publication of this  
555 paper.

556

## 557 **Funding**

558 This research was partly supported by the Seven Framework Program of the European  
559 Commission (project: ‘3SR: Sustainable Solutions for Small Ruminants’), a Biotechnology and  
560 Biological Sciences Research Council (BBSRC) Grant ‘Functional Annotation of the Sheep  
561 Genome’ ref.: BB/L001209/1 and BBSRC Institute Strategic Programme Grants ‘Analysis and  
562 Prediction in Complex Animal Systems’ ref.: BB/J004235/1 and Farm animal genomics ref:  
563 BBS/E/D/20211550, ‘Blue Prints for Healthy Animals’ ref.: BB/P013732/1 and ‘Improving  
564 Animal Production & Welfare’ ref.: BB/P013759/1 as well as the Laboratory of Animal  
565 Production, School of Veterinary Medicine, Aristotle University of Thessaloniki, Greece. The  
566 contribution of GBa was also supported by the Rural & Environment Science & Analytical  
567 Services Division of the Scottish Government.

568

## 569 **Availability of data and materials**

570 All the raw gene expression data comprising the Texel and the Texel x Scottish Blackface gene  
571 expression atlas is available in the European Nucleotide Archive (ENA) under accession  
572 number PRJEB6169 and PRJEB19199, respectively. To supplement the data from these two  
573 transcriptomic atlas projects, we also obtained expression levels from a milk transcriptomic  
574 study of the milk somatic cells of two Spanish dairy sheep breeds, Churra and Assaf (Gene

575 Expression Omnibus (GEO) database accession number GSE74825 and NCBI BioProject ID  
576 PRJNA301615).

577

## 578 **Authors' contributions**

579 GBa, AP and GA conceived and designed the genetic study of Chios sheep and secured  
580 substantial funding. AP, GBr and GBa performed data collection, phenotyping, DNA  
581 extractions and genetic parameter analysis. AP and GBa collated and edited the genotyping  
582 data and performed the genomic analysis. DAH and ELC conceived and designed the sheep  
583 gene expression atlas and DAH secured the substantial funding. ELC and SJB created the sheep  
584 gene expression atlas and analysed the gene expression data for the atlas dataset and the milk  
585 transcriptome. AP performed the pathway and the TFBS analyses. AP and SJB extracted and  
586 annotated the re-sequencing data of the HapMap sheep. PD performed the allelic expression  
587 imbalance analysis with input from AP, ELC, SJB and DAH. GBa, DH, GA, ELC and AP  
588 interpreted these results. GBa and AP wrote the manuscript. All other co-authors provided  
589 manuscript editing and feedback. All authors read and approved the final manuscript.

590

## 591 **Acknowledgements**

592 The authors thank the cooperation of the commercial farmers who allowed access to their  
593 respective flocks.

594

## 595 **References**

- 596 1. Miltiadou D, Hager-Theodorides AL, Symeou S, Constantinou C, Psifidi A, Banos G, et al.  
597 Variants in the 3' untranslated region of the ovine acetyl-coenzyme A acyltransferase 2 gene are  
598 associated with dairy traits and exhibit differential allelic expression. *Journal of Dairy Science*.  
599 2017;100(8):6285-97. doi: <https://doi.org/10.3168/jds.2016-12326>.
- 600 2. Barillet F. Genetic improvement for dairy production in sheep and goats. *Small Ruminant*  
601 *Research*. 2007;70(1):60-75. doi: <http://dx.doi.org/10.1016/j.smallrumres.2007.01.004>.
- 602 3. Legarra A, Ugarte E. Genetic Parameters of Udder Traits, Somatic Cell Score, and Milk Yield  
603 in Latxa Sheep. *Journal of Dairy Science*. 2005;88(6):2238-45. doi:  
604 [https://doi.org/10.3168/jds.S0022-0302\(05\)72899-X](https://doi.org/10.3168/jds.S0022-0302(05)72899-X).
- 605 4. Baro J, San Primitivo F, Facultad De Veterinaria I, Spa L. Breeding programme for the Spanish  
606 Churra sheep breed 1995.
- 607 5. Mavrogenis AP, Papachristoforou C. Genetic and phenotypic relationships between milk  
608 production and body weight in Chios sheep and Damascus goats. *Livestock Production Science*.  
609 2000;67(1/2):81-7. doi: 10.1016/S0301-6226(00)00187-1.
- 610 6. Davies G, Genini S, Bishop SC, Giuffra E. An assessment of opportunities to dissect host  
611 genetic variation in resistance to infectious diseases in livestock. *Animal : an international journal of*  
612 *animal bioscience*. 2009;3(3):415-36. Epub 2009/03/01. doi: 10.1017/S1751731108003522. PubMed  
613 PMID: 22444313.
- 614 7. Bishop SC, Axford RFE, Nicholas FW, Owen JB. Breeding for disease resistance in farm  
615 animals: CABI Publishing; 2010.
- 616 8. Merz A, Stephan R, Johler S. Staphylococcus aureus Isolates from Goat and Sheep Milk Seem  
617 to Be Closely Related and Differ from Isolates Detected from Bovine Milk. *Frontiers in Microbiology*.  
618 2016;7:319. doi: 10.3389/fmicb.2016.00319. PubMed PMID: PMC4789554.
- 619 9. Authority EFS. Scientific opinion on the welfare risks related to the farming of sheep for  
620 wool, meat and milk production. *EFSA J*. 2014;12:128
- 621 10. Banos G, Bramis G, Bush SJ, Clark EL, McCulloch MEB, Smith J, et al. The genomic  
622 architecture of mastitis resistance in dairy sheep. *BMC Genomics*. 2017;18(1):624. Epub 2017/08/18.  
623 doi: 10.1186/s12864-017-3982-1. PubMed PMID: 28814268; PubMed Central PMCID:  
624 PMCPMC5559839.
- 625 11. Rupp R, Senin P, Sarry J, Allain C, Tasca C, Ligat L, et al. A Point Mutation in Suppressor of  
626 Cytokine Signalling 2 (Socs2) Increases the Susceptibility to Inflammation of the Mammary Gland  
627 while Associated with Higher Body Weight and Size and Higher Milk Production in a Sheep Model.  
628 *PLoS genetics*. 2015;11(12):e1005629. Epub 2015/12/15. doi: 10.1371/journal.pgen.1005629.  
629 PubMed PMID: 26658352; PubMed Central PMCID: PMCPmc4676722.
- 630 12. Gutiérrez-Gil B G-GE, Suárez-Vega A., Arranz JJ Detection of QTL influencing somatic cell  
631 score in Churra sheep employing the OvineSNP50 BeadChip. EAAP, 64th Annual Meeting, Nantes  
632 2013.  
633 2013;[http://old.eaap.org/Previous\\_Annual\\_Meetings/2013Nantes/Nantes\\_2013\\_Abstracts.pdf](http://old.eaap.org/Previous_Annual_Meetings/2013Nantes/Nantes_2013_Abstracts.pdf).
- 634 13. Sechi S CS, Casula M, Congiu GB, Miari S, Mulas G, Salaris S, Sechi T, Usai MG, Ligios C,  
635 Foucras G, Carta A. Genome -wide association analysis of resistance to paratuberculosis and mastitis  
636 in dairy sheep. EAAP, 64th Annual Meeting, Nantes 2013. 2013.
- 637 14. Gilmour AR, Cullis, B.R. and Thompson, R. ASREML User Guide, Release 3.0, NSW  
638 Department of Primary Industries, Australia. 2009.
- 639 15. Psifidi A, Dovas CI, Bramis G, Lazou T, Russel CL, Arsenos G, et al. Comparison of eleven  
640 methods for genomic DNA extraction suitable for large-scale whole-genome genotyping and long-  
641 term DNA banking using blood samples. *PLoS One*. 2015;10(1):e0115960. doi:  
642 10.1371/journal.pone.0115960.
- 643 16. Aulchenko YS, Ripke S, Isaacs A, van Duijn CM. GenABEL: an R library for genome-wide  
644 association analysis. *Bioinformatics (Oxford, England)*. 2007;23(10):1294-6. Epub 2007/03/27. doi:  
645 10.1093/bioinformatics/btm108. PubMed PMID: 17384015.



- 646 17. Zhou X, Stephens M. Efficient multivariate linear mixed model algorithms for genome-wide  
647 association studies. *Nat Methods*. 2014;11(4):407-9. Epub 2014/02/18. doi: 10.1038/nmeth.2848.  
648 PubMed PMID: 24531419; PubMed Central PMCID: PMC4211878.
- 649 18. Purcell S, Neale B, Todd-Brown K, Thomas L, Ferreira MA, Bender D, et al. PLINK: a tool set  
650 for whole-genome association and population-based linkage analyses. *Am J Hum Genet*.  
651 2007;81(3):559-75. Epub 2007/08/19. doi: 10.1086/519795. PubMed PMID: 17701901; PubMed  
652 Central PMCID: PMC1950838.
- 653 19. Barrett JC, Fry B, Maller J, Daly MJ. Haploview: analysis and visualization of LD and haplotype  
654 maps. *Bioinformatics (Oxford, England)*. 2005;21(2):263-5. Epub 2004/08/07. doi:  
655 10.1093/bioinformatics/bth457. PubMed PMID: 15297300.
- 656 20. Krämer A, Green J, Pollard J, Tugendreich S. Causal analysis approaches in Ingenuity Pathway  
657 Analysis. *Bioinformatics (Oxford, England)*. 2014;30(4):523-30. doi: 10.1093/bioinformatics/btt703.  
658 PubMed PMID: PMC3928520.
- 659 21. Dennis G, Jr., Sherman BT, Hosack DA, Yang J, Gao W, Lane HC, et al. DAVID: Database for  
660 Annotation, Visualization, and Integrated Discovery. *Genome Biol*. 2003;4(5):P3. Epub 2003/05/08.  
661 PubMed PMID: 12734009.
- 662 22. Suarez-Vega A, Gutierrez-Gil B, Klopp C, Tosser-Klopp G, Arranz JJ. Comprehensive RNA-Seq  
663 profiling to evaluate lactating sheep mammary gland transcriptome. *Scientific data*. 2016;3:160051.  
664 Epub 2016/07/06. doi: 10.1038/sdata.2016.51. PubMed PMID: 27377755; PubMed Central PMCID:  
665 PMC4932878.
- 666 23. Suarez-Vega A, Gutierrez-Gil B, Klopp C, Robert-Granie C, Tosser-Klopp G, Arranz JJ.  
667 Characterization and Comparative Analysis of the Milk Transcriptome in Two Dairy Sheep Breeds  
668 using RNA Sequencing. *Scientific reports*. 2015;5:18399. Epub 2015/12/19. doi: 10.1038/srep18399.  
669 PubMed PMID: 26677795; PubMed Central PMCID: PMC4683406.
- 670 24. Clark EL, Bush SJ, McCulloch MEB, Farquhar IL, Young R, Lefevre L, et al. A high resolution  
671 atlas of gene expression in the domestic sheep (*Ovis aries*). *PLoS genetics*. 2017;13(9):e1006997. doi:  
672 10.1371/journal.pgen.1006997.
- 673 25. Jiang Y, Xie M, Chen W, Talbot R, Maddox JF, Faraut T, et al. The sheep genome illuminates  
674 biology of the rumen and lipid metabolism. *Science*. 2014;344(6188):1168-73. Epub 2014/06/07. doi:  
675 10.1126/science.1252806. PubMed PMID: 24904168; PubMed Central PMCID: PMC4157056.
- 676 26. Bray NL, Pimentel H, Melsted P, Pachter L. Near-optimal probabilistic RNA-seq  
677 quantification. *Nat Biotech*. 2016;34(5):525-7. doi: 10.1038/nbt.3519
- 678 <http://www.nature.com/nbt/journal/v34/n5/abs/nbt.3519.html#supplementary-information>.
- 679 27. Sonesson C, Love MI, Robinson MD. Differential analyses for RNA-seq: transcript-level  
680 estimates improve gene-level inferences. *F1000Res*. 2015;4:1521. Epub 2016/03/01. doi:  
681 10.12688/f1000research.7563.1. PubMed PMID: 26925227; PubMed Central PMCID:  
682 PMC4712774.
- 683 28. Morley M, Molony CM, Weber TM, Devlin JL, Ewens KG, Spielman RS, et al. Genetic analysis  
684 of genome-wide variation in human gene expression. *Nature*. 2004;430(7001):743-7. Epub  
685 2004/07/23. doi: 10.1038/nature02797. PubMed PMID: 15269782; PubMed Central PMCID:  
686 PMC2966974.
- 687 29. Stranger BE, Forrest MS, Clark AG, Minichiello MJ, Deutsch S, Lyle R, et al. Genome-wide  
688 associations of gene expression variation in humans. *PLoS genetics*. 2005;1(6):e78. Epub  
689 2005/12/20. doi: 10.1371/journal.pgen.0010078. PubMed PMID: 16362079; PubMed Central PMCID:  
690 PMC1315281.
- 691 30. Bray NJ, Buckland PR, Owen MJ, O'Donovan MC. Cis-acting variation in the expression of a  
692 high proportion of genes in human brain. *Human genetics*. 2003;113(2):149-53. Epub 2003/05/03.  
693 doi: 10.1007/s00439-003-0956-y. PubMed PMID: 12728311.
- 694 31. Chamberlain AJ, Vander Jagt CJ, Hayes BJ, Khansefid M, Marett LC, Millen CA, et al. Extensive  
695 variation between tissues in allele specific expression in an outbred mammal. *BMC Genomics*.

- 696 2015;16:993. Epub 2015/11/26. doi: 10.1186/s12864-015-2174-0. PubMed PMID: 26596891;  
697 PubMed Central PMCID: PMC4657355.
- 698 32. Kim D, Langmead B, Salzberg SL. HISAT: a fast spliced aligner with low memory  
699 requirements. *Nat Methods*. 2015;12(4):357-60. Epub 2015/03/10. doi: 10.1038/nmeth.3317.  
700 PubMed PMID: 25751142; PubMed Central PMCID: PMC4655817.
- 701 33. Li H. A statistical framework for SNP calling, mutation discovery, association mapping and  
702 population genetical parameter estimation from sequencing data. *Bioinformatics (Oxford, England)*.  
703 2011;27(21):2987-93. Epub 2011/09/10. doi: 10.1093/bioinformatics/btr509. PubMed PMID:  
704 21903627; PubMed Central PMCID: PMC3198575.
- 705 34. Quinlan AR, Hall IM. BEDTools: a flexible suite of utilities for comparing genomic features.  
706 *Bioinformatics (Oxford, England)*. 2010;26(6):841-2. Epub 2010/01/30. doi:  
707 10.1093/bioinformatics/btq033. PubMed PMID: 20110278; PubMed Central PMCID:  
708 PMC4657355.
- 709 35. Cingolani P, Platts A, Wang le L, Coon M, Nguyen T, Wang L, et al. A program for annotating  
710 and predicting the effects of single nucleotide polymorphisms, SnpEff: SNPs in the genome of  
711 *Drosophila melanogaster* strain w1118; iso-2; iso-3. *Fly*. 2012;6(2):80-92. Epub 2012/06/26. doi:  
712 10.4161/fly.19695. PubMed PMID: 22728672; PubMed Central PMCID: PMC3679285.
- 713 36. Mayba O, Gilbert HN, Liu J, Haverty PM, Jhunjunwala S, Jiang Z, et al. MBASED: allele-  
714 specific expression detection in cancer tissues and cell lines. *Genome Biol*. 2014;15(8):405. Epub  
715 2014/10/16. doi: 10.1186/s13059-014-0405-3. PubMed PMID: 25315065; PubMed Central PMCID:  
716 PMC4165366.
- 717 37. Benjamini Y, Hochberg Y. Controlling the False Discovery Rate: A Practical and Powerful  
718 Approach to Multiple Testing. *Journal of the Royal Statistical Society Series B (Methodological)*.  
719 1995;57(1):289-300.
- 720 38. Hagnestam-Nielsen C, Emanuelson U, Berglund B, Strandberg E. Relationship between  
721 somatic cell count and milk yield in different stages of lactation. *J Dairy Sci*. 2009;92(7):3124-33.  
722 Epub 2009/06/17. doi: 10.3168/jds.2008-1719. PubMed PMID: 19528590.
- 723 39. Dong M, Bridges JP, Apsley K, Xu Y, Weaver TE. ERdj4 and ERdj5 are required for  
724 endoplasmic reticulum-associated protein degradation of misfolded surfactant protein C. *Molecular*  
725 *biology of the cell*. 2008;19(6):2620-30. Epub 2008/04/11. doi: 10.1091/mbc.E07-07-0674. PubMed  
726 PMID: 18400946; PubMed Central PMCID: PMC2397301.
- 727 40. Oka OB, Pringle MA, Schopp IM, Braakman I, Bulleid NJ. ERdj5 is the ER reductase that  
728 catalyzes the removal of non-native disulfides and correct folding of the LDL receptor. *Molecular cell*.  
729 2013;50(6):793-804. Epub 2013/06/19. doi: 10.1016/j.molcel.2013.05.014. PubMed PMID:  
730 23769672; PubMed Central PMCID: PMC3906653.
- 731 41. Burger M, Zimmermann TJ, Kondoh Y, Stege P, Watanabe N, Osada H, et al. Crystal structure  
732 of the predicted phospholipase LYPLAL1 reveals unexpected functional plasticity despite close  
733 relationship to acyl protein thioesterases. *Journal of lipid research*. 2012;53(1):43-50. Epub  
734 2011/11/05. doi: 10.1194/jlr.M019851. PubMed PMID: 22052940; PubMed Central PMCID:  
735 PMC3243480.
- 736 42. Emoto H, Tagashira S, Mattei MG, Yamasaki M, Hashimoto G, Katsumata T, et al. Structure  
737 and expression of human fibroblast growth factor-10. *J Biol Chem*. 1997;272(37):23191-4. Epub  
738 1997/09/12. PubMed PMID: 9287324.
- 739 43. Sorensen K, Aksglaede L, Munch-Andersen T, Aachmann-Andersen NJ, Leffers H, Helge JW,  
740 et al. Impact of the growth hormone receptor exon 3 deletion gene polymorphism on glucose  
741 metabolism, lipids, and insulin-like growth factor-I levels during puberty. *The Journal of clinical*  
742 *endocrinology and metabolism*. 2009;94(8):2966-9. Epub 2009/05/07. doi: 10.1210/jc.2009-0313.  
743 PubMed PMID: 19417039.
- 744 44. Shafqat N, Turnbull A, Zschocke J, Oppermann U, Yue WW. Crystal structures of human  
745 HMG-CoA synthase isoforms provide insights into inherited ketogenesis disorders and inhibitor

- 746 design. *Journal of molecular biology*. 2010;398(4):497-506. Epub 2010/03/30. doi:  
747 10.1016/j.jmb.2010.03.034. PubMed PMID: 20346956.
- 748 45. Song XQ, Fukao T, Mitchell GA, Kassovska-Bratinova S, Ugarte M, Wanders RJ, et al. Succinyl-  
749 CoA:3-ketoacid coenzyme A transferase (SCOT): development of an antibody to human SCOT and  
750 diagnostic use in hereditary SCOT deficiency. *Biochimica et biophysica acta*. 1997;1360(2):151-6.  
751 Epub 1997/04/12. PubMed PMID: 9128180.
- 752 46. Tzankov S, Wong MJ, Shi K, Nassif C, Young JC. Functional divergence between co-  
753 chaperones of Hsc70. *J Biol Chem*. 2008;283(40):27100-9. Epub 2008/08/08. doi:  
754 10.1074/jbc.M803923200. PubMed PMID: 18684711; PubMed Central PMCID: PMCPMC5026489.
- 755 47. Rupp R, Boichard D. Genetics of resistance to mastitis in dairy cattle. *Veterinary research*.  
756 2003;34(5):671-88. Epub 2003/10/15. doi: 10.1051/vetres:2003020. PubMed PMID: 14556700.
- 757 48. Tolone M, Riggio V, Portolano B. Estimation of genetic and phenotypic parameters for  
758 bacteriological status of the udder, somatic cell score, and milk yield in dairy sheep using a threshold  
759 animal model. *Livestock Science*. 2013;151(2-3):134-9. doi: 10.1016/j.livsci.2012.11.014.
- 760 49. Juan José Arranz BGr-G. Detection of QTL Underlying Milk Traits in Sheep: An Update, Milk  
761 Production. In: Chaiyabutr PN, editor. *Advanced Genetic Traits, Cellular Mechanism, Animal*  
762 *Management and Health: InTech*; 2012.
- 763 50. Ligda C, Papadopoulos T, Mavrogenis A, Georgoudis A. Genetic parameters for test day milk  
764 traits and somatic cell counts in Chios dairy sheep. In: Gabiña D, Sanna S, editors. *Breeding*  
765 *programmes for improving the quality and safety of products New traits, tools, rules and*  
766 *organization? Options Méditerranéennes : Série A. Séminaires Méditerranéens*. 55: Zaragoza :  
767 CIHEAM; 2003. p. 55-9.
- 768 51. Gutierrez-Gil B, Arranz JJ, Pong-Wong R, Garcia-Gamez E, Kijas J, Wiener P. Application of  
769 selection mapping to identify genomic regions associated with dairy production in sheep. *PLoS One*.  
770 2014;9(5):e94623. Epub 2014/05/03. doi: 10.1371/journal.pone.0094623. PubMed PMID: 24788864;  
771 PubMed Central PMCID: PMCPMC4006912.
- 772 52. Mateescu RG, Thonney ML. Genetic mapping of quantitative trait loci for milk production in  
773 sheep. *Anim Genet*. 2010;41(5):460-6. Epub 2010/04/17. doi: 10.1111/j.1365-2052.2010.02045.x.  
774 PubMed PMID: 20394603.
- 775 53. Garcia-Gamez E, Gutierrez-Gil B, Sahana G, Sanchez JP, Bayon Y, Arranz JJ. GWA analysis for  
776 milk production traits in dairy sheep and genetic support for a QTN influencing milk protein  
777 percentage in the LALBA gene. *PLoS One*. 2012;7(10):e47782. Epub 2012/10/25. doi:  
778 10.1371/journal.pone.0047782. PubMed PMID: 23094085; PubMed Central PMCID:  
779 PMCPMC3475704.
- 780 54. Chatziplis DG, Tzamaloukas O, Miltiadou D, Ligda C, Koumas A, Mavrogenis AP, et al.  
781 Evidence of major gene(s) affecting milk traits in the Chios sheep breed. *Small Ruminant Research*.  
782 2012;105(1):61-8. doi: <https://doi.org/10.1016/j.smallrumres.2011.12.009>.
- 783 55. Suárez-Vega A, Gutiérrez-Gil B, Klopp C, Tosser-Klopp G, Arranz JJ. Variant discovery in the  
784 sheep milk transcriptome using RNA sequencing. *BMC Genomics*. 2017;18(1):170. doi:  
785 10.1186/s12864-017-3581-1.
- 786 56. Gotoh T, Terada K, Oyadomari S, Mori M. hsp70-DnaJ chaperone pair prevents nitric oxide-  
787 and CHOP-induced apoptosis by inhibiting translocation of Bax to mitochondria. *Cell death and*  
788 *differentiation*. 2004;11(4):390-402. Epub 2004/01/31. doi: 10.1038/sj.cdd.4401369. PubMed PMID:  
789 14752510.
- 790 57. Stefanon B, Colitti M, Gabai G, Knight CH, Wilde CJ. Mammary apoptosis and lactation  
791 persistency in dairy animals. *The Journal of dairy research*. 2002;69(1):37-52. Epub 2002/06/06.  
792 PubMed PMID: 12047109.
- 793 58. Bionaz M, Loor JJ. Gene networks driving bovine milk fat synthesis during the lactation cycle.  
794 *BMC Genomics*. 2008;9:366. Epub 2008/08/02. doi: 10.1186/1471-2164-9-366. PubMed PMID:  
795 18671863; PubMed Central PMCID: PMCPMC2547860.

- 796 59. Zarrin M, Wellnitz O, van Dorland HA, Gross JJ, Bruckmaier RM. Hyperketonemia during  
797 lipopolysaccharide-induced mastitis affects systemic and local intramammary metabolism in dairy  
798 cows. *Journal of Dairy Science*. 2014;97(6):3531-41. doi: <https://doi.org/10.3168/jds.2013-7480>.  
799 60. Tiezzi F, Parker-Gaddis KL, Cole JB, Clay JS, Maltecca C. A Genome-Wide Association Study  
800 for Clinical Mastitis in First Parity US Holstein Cows Using Single-Step Approach and Genomic Matrix  
801 Re-Weighting Procedure. *PLoS ONE*. 2015;10(2):e0114919. doi: 10.1371/journal.pone.0114919.  
802 PubMed PMID: PMC4319771.
- 803 61. Raven LA, Cocks BG, Goddard ME, Pryce JE, Hayes BJ. Genetic variants in mammary  
804 development, prolactin signalling and involution pathways explain considerable variation in bovine  
805 milk production and milk composition. *Genet Sel Evol*. 2014;46:29. Epub 2014/05/02. doi:  
806 10.1186/1297-9686-46-29. PubMed PMID: 24779965; PubMed Central PMCID: PMC4036308.
- 807 62. Sun D, Jia J, Ma Y, Zhang Y, Wang Y, Yu Y, et al. Effects of DGAT1 and GHR on milk yield and  
808 milk composition in the Chinese dairy population. *Animal Genetics*. 2009;40(6):997-1000. doi:  
809 10.1111/j.1365-2052.2009.01945.x.
- 810 63. Rahmatalla SA, Muller U, Strucken EM, Reissmann M, Brockmann GA. The F279Y  
811 polymorphism of the GHR gene and its relation to milk production and somatic cell score in German  
812 Holstein dairy cattle. *Journal of applied genetics*. 2011;52(4):459-65. Epub 2011/06/11. doi:  
813 10.1007/s13353-011-0051-3. PubMed PMID: 21660490.
- 814 64. Ogorevc J, Kunej T, Razpet A, Dovc P. Database of cattle candidate genes and genetic  
815 markers for milk production and mastitis. *Anim Genet*. 2009;40(6):832-51. Epub 2009/06/11. doi:  
816 10.1111/j.1365-2052.2009.01921.x. PubMed PMID: 19508288; PubMed Central PMCID:  
817 PMC4036308.
- 818 65. Gutiérrez-Gil B, Arranz JJ, Wiener P. An interpretive review of selective sweep studies in *Bos*  
819 *taurus* cattle populations: identification of unique and shared selection signals across breeds.  
820 *Frontiers in genetics*. 2015;6(167). doi: 10.3389/fgene.2015.00167.
- 821 66. Yodklaew P, Koonawootrittriron S, Elzo MA, Suwanasopee T, Laodim T. Genome-wide  
822 association study for lactation characteristics, milk yield and age at first calving in a Thai multibreed  
823 dairy cattle population. *Agriculture and Natural Resources*. 2017;51(3):223-30. doi:  
824 <https://doi.org/10.1016/j.anres.2017.04.002>.
- 825 67. Cui Y, Li Q. Expression and functions of fibroblast growth factor 10 in the mouse mammary  
826 gland. *International journal of molecular sciences*. 2013;14(2):4094-105. Epub 2013/02/26. doi:  
827 10.3390/ijms14024094. PubMed PMID: 23434672; PubMed Central PMCID: PMC3588087.
- 828 68. Pallister KB, Mason S, Nygaard TK, Liu B, Griffith S, Jones J, et al. Bovine CCL28 Mediates  
829 Chemotaxis via CCR10 and Demonstrates Direct Antimicrobial Activity against Mastitis Causing  
830 Bacteria. *PLoS One*. 2015;10(9):e0138084. Epub 2015/09/12. doi: 10.1371/journal.pone.0138084.  
831 PubMed PMID: 26359669; PubMed Central PMCID: PMC4567263.
- 832 69. Bourges D, Meurens F, Berri M, Chevaleyre C, Zanello G, Levast B, et al. New insights into the  
833 dual recruitment of IgA+ B cells in the developing mammary gland. *Mol Immunol*. 2008;45(12):3354-  
834 62. Epub 2008/06/06. doi: 10.1016/j.molimm.2008.04.017. PubMed PMID: 18533264.
- 835 70. Hieshima K, Ohtani H, Shibano M, Izawa D, Nakayama T, Kawasaki Y, et al. CCL28 has dual  
836 roles in mucosal immunity as a chemokine with broad-spectrum antimicrobial activity. *Journal of*  
837 *immunology (Baltimore, Md : 1950)*. 2003;170(3):1452-61. Epub 2003/01/23. PubMed PMID:  
838 12538707.
- 839 71. Low EN, Zagieboylo L, Martino B, Wilson E. IgA ASC accumulation to the lactating mammary  
840 gland is dependent on VCAM-1 and alpha4 integrins. *Mol Immunol*. 2010;47(7-8):1608-12. Epub  
841 2010/02/23. doi: 10.1016/j.molimm.2010.01.015. PubMed PMID: 20171738; PubMed Central  
842 PMCID: PMC2849929.
- 843 72. Wu T, Ren MX, Chen GP, Jin ZM, Wang G. Rrp15 affects cell cycle, proliferation, and  
844 apoptosis in NIH3T3 cells. *FEBS open bio*. 2016;6(11):1085-92. Epub 2016/11/12. doi: 10.1002/2211-  
845 5463.12128. PubMed PMID: 27833849; PubMed Central PMCID: PMC4567263.

- 846 73. Mignone F, Gissi C, Liuni S, Pesole G. Untranslated regions of mRNAs. *Genome biology*.  
847 2002;3(3):REVIEWS0004-REVIEWS. Epub 02/28. PubMed PMID: 11897027.
- 848 74. Clop A, Marcq F, Takeda H, Pirottin D, Tordoir X, Bibe B, et al. A mutation creating a potential  
849 illegitimate microRNA target site in the myostatin gene affects muscularity in sheep. *Nature*  
850 *genetics*. 2006;38(7):813-8. Epub 2006/06/06. doi: 10.1038/ng1810. PubMed PMID: 16751773.
- 851 75. Sticht C, De La Torre C, Parveen A, Gretz N. miRWalk: An online resource for prediction of  
852 microRNA binding sites. *PLoS One*. 2018;13(10):e0206239. Epub 2018/10/20. doi:  
853 10.1371/journal.pone.0206239. PubMed PMID: 30335862.
- 854 76. Lawless N, Foroushani AB, McCabe MS, O'Farrelly C, Lynn DJ. Next generation sequencing  
855 reveals the expression of a unique miRNA profile in response to a gram-positive bacterial infection.  
856 *PLoS One*. 2013;8(3):e57543. Epub 2013/03/09. doi: 10.1371/journal.pone.0057543. PubMed PMID:  
857 23472090; PubMed Central PMCID: PMC3589390.

858

859

860

861

## 862 **Supplementary files**

863 **S1 Table.** Linkage disequilibrium (LD) estimates (expressed as  $r^2$ ) for the significant SNP  
864 markers identified in the genomic association analyses of milk yield and mastitis resistance in  
865 Chios sheep.

866 **S2 Table.** Genes located in the candidate genomic regions identified for milk yield in Chios  
867 sheep.

868 **S3 Table.** Allelic expression imbalance analysis using the one-sampled MBASED method.

869 **S1 Fig.** Expression level of genes located in the milk yield candidate regions, as extracted from  
870 the Churra and Assaf sheep milk transcriptome analysis. Expression level is estimated as the  
871 mean number of transcripts per million of all (5) experimental replicates and is represented  
872 here as a z-score per individual animal.

873 **S2 Fig.** Expression level of genes located in the milk yield candidate regions, across all cell  
874 lines/tissues. Expression level is estimated as the mean number of transcripts per million (TPM)  
875 of all five (5) experimental replicates and is represented here as a z-score per cell line/tissue.  
876 Data is obtained from the sheep gene expression atlas which includes data from Texel X  
877 Scottish Blackface and Texel sheep.

878 **S3 Fig.** Expression level of genes, located in the milk yield candidate regions, across both  
879 mammary gland and immune cell lines/tissues. Expression level is estimated as the mean  
880 number of transcripts per million of all five (5) experimental replicates and is represented here  
881 as a z-score per cell line/tissue. Data is obtained from the sheep gene expression atlas which  
882 includes data from Texel X Scottish Blackface and Texel sheep.

883

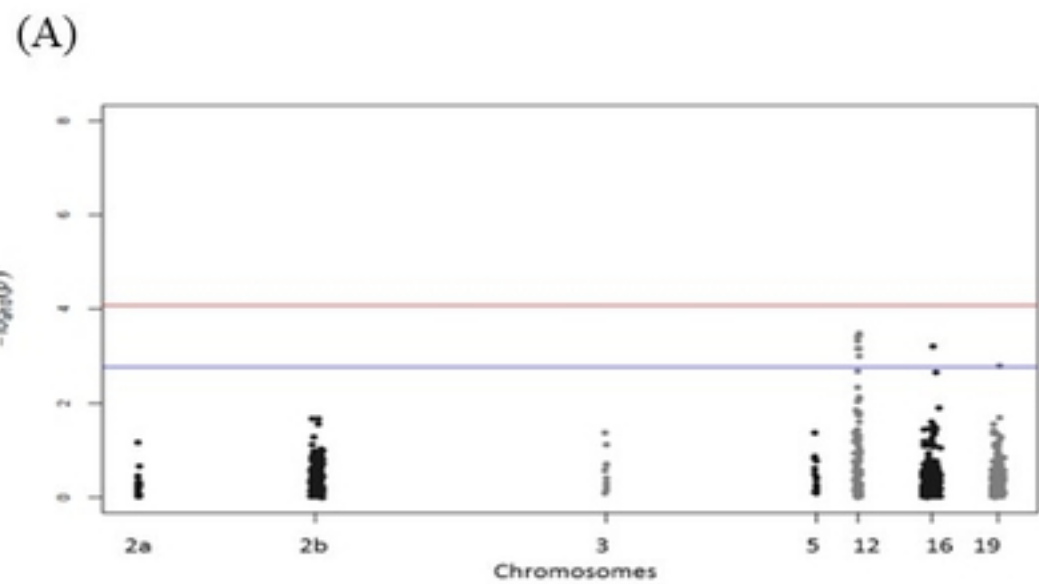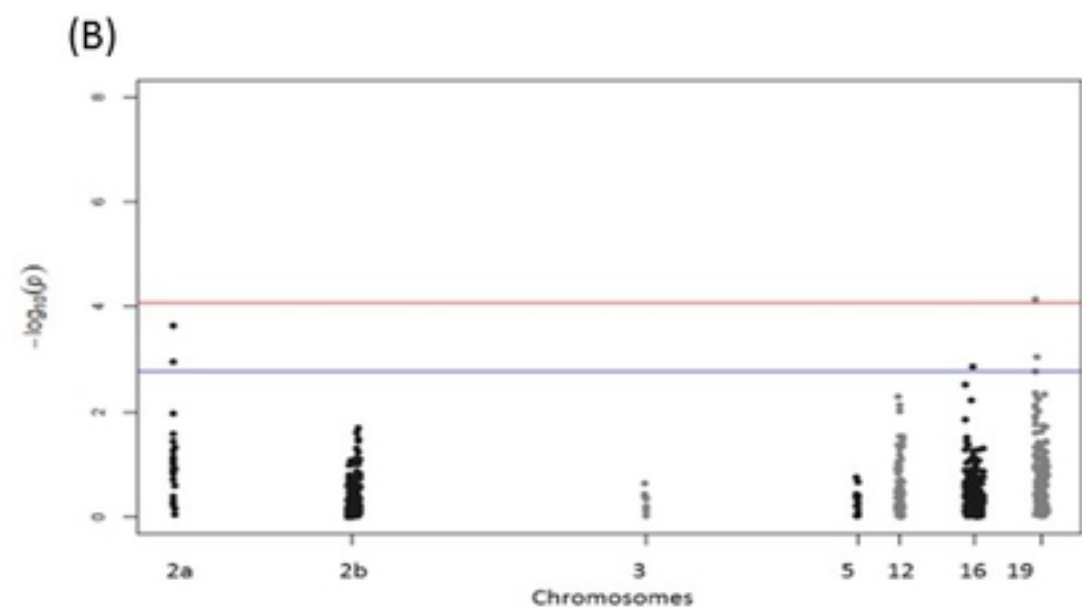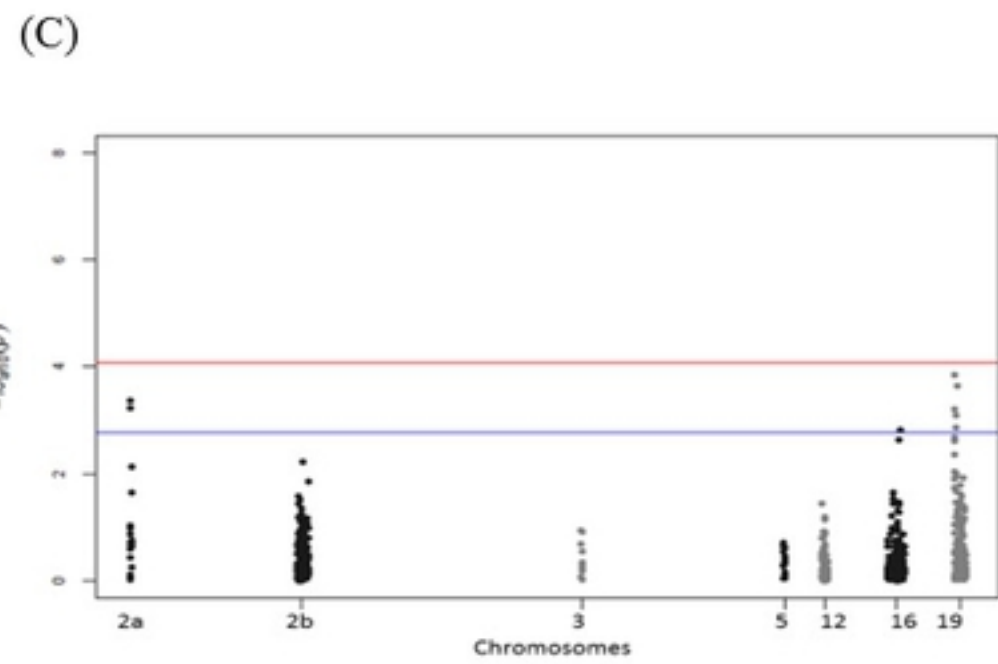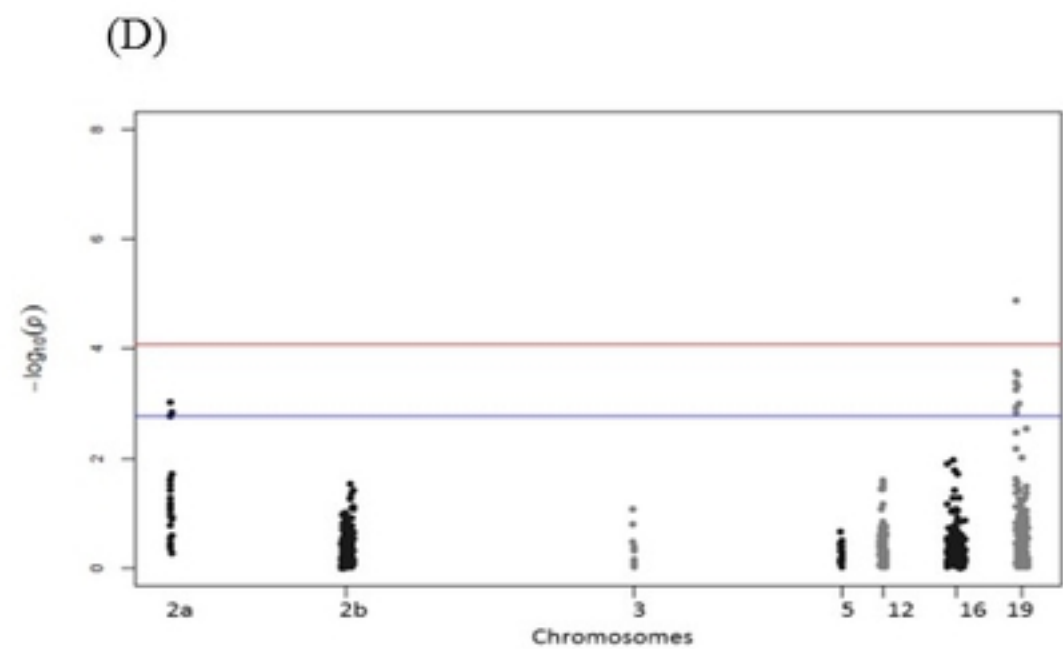

Figure 1

**(A)**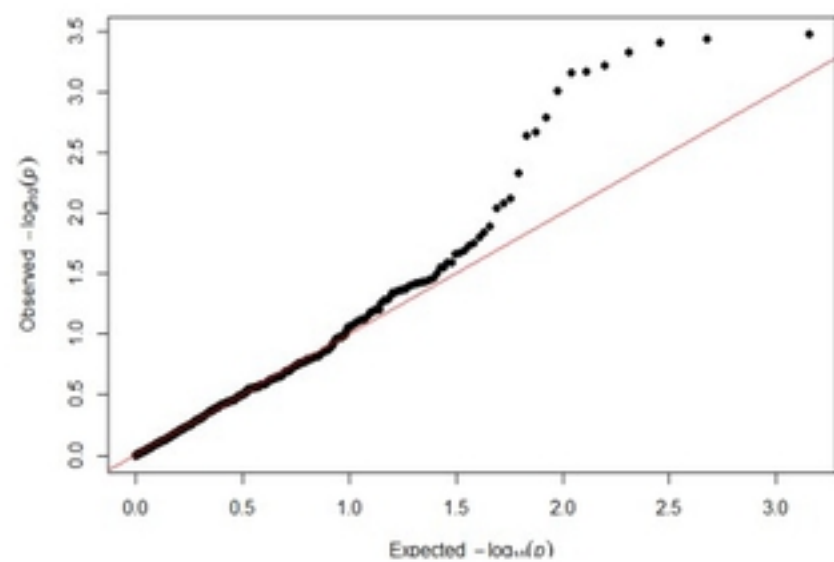**(B)**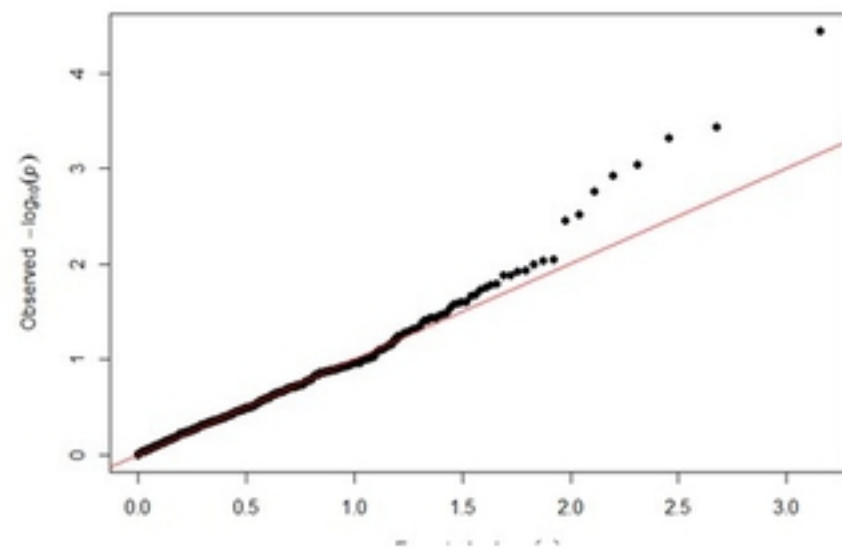**(C)**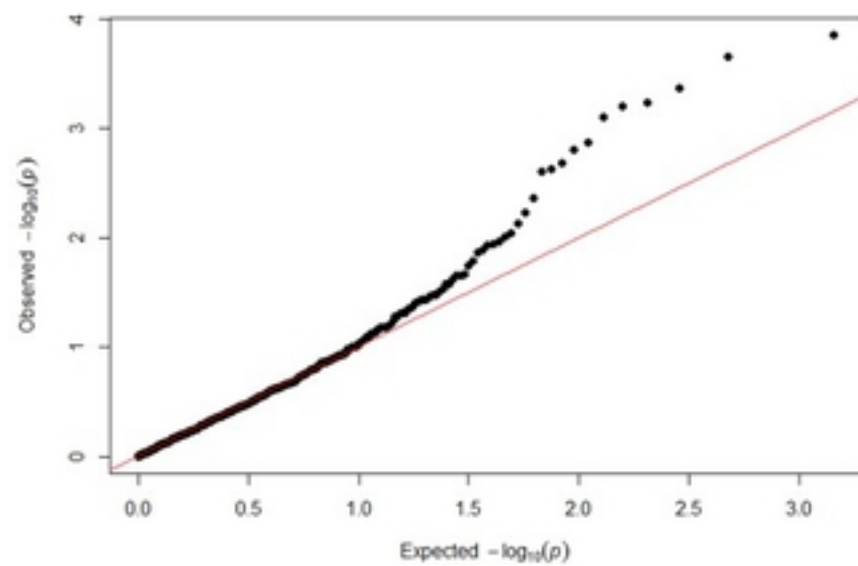**(D)**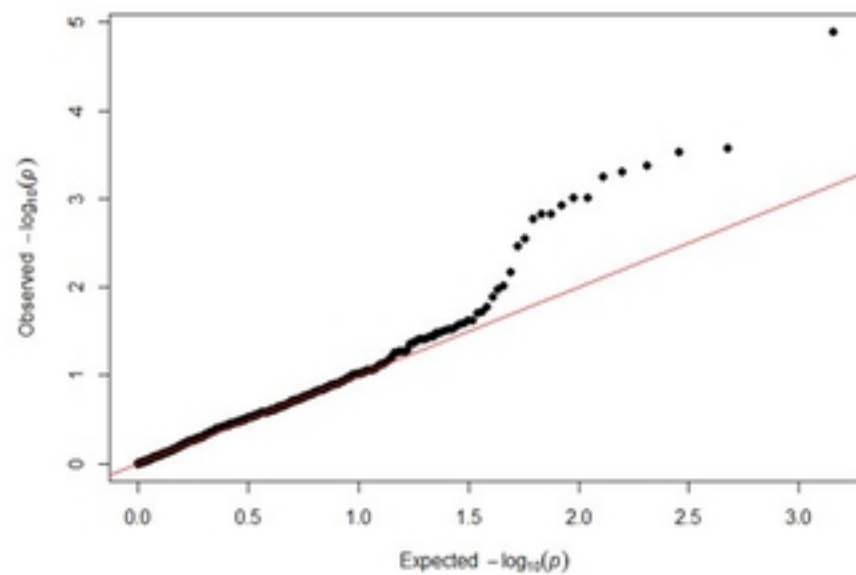**Figure 2**



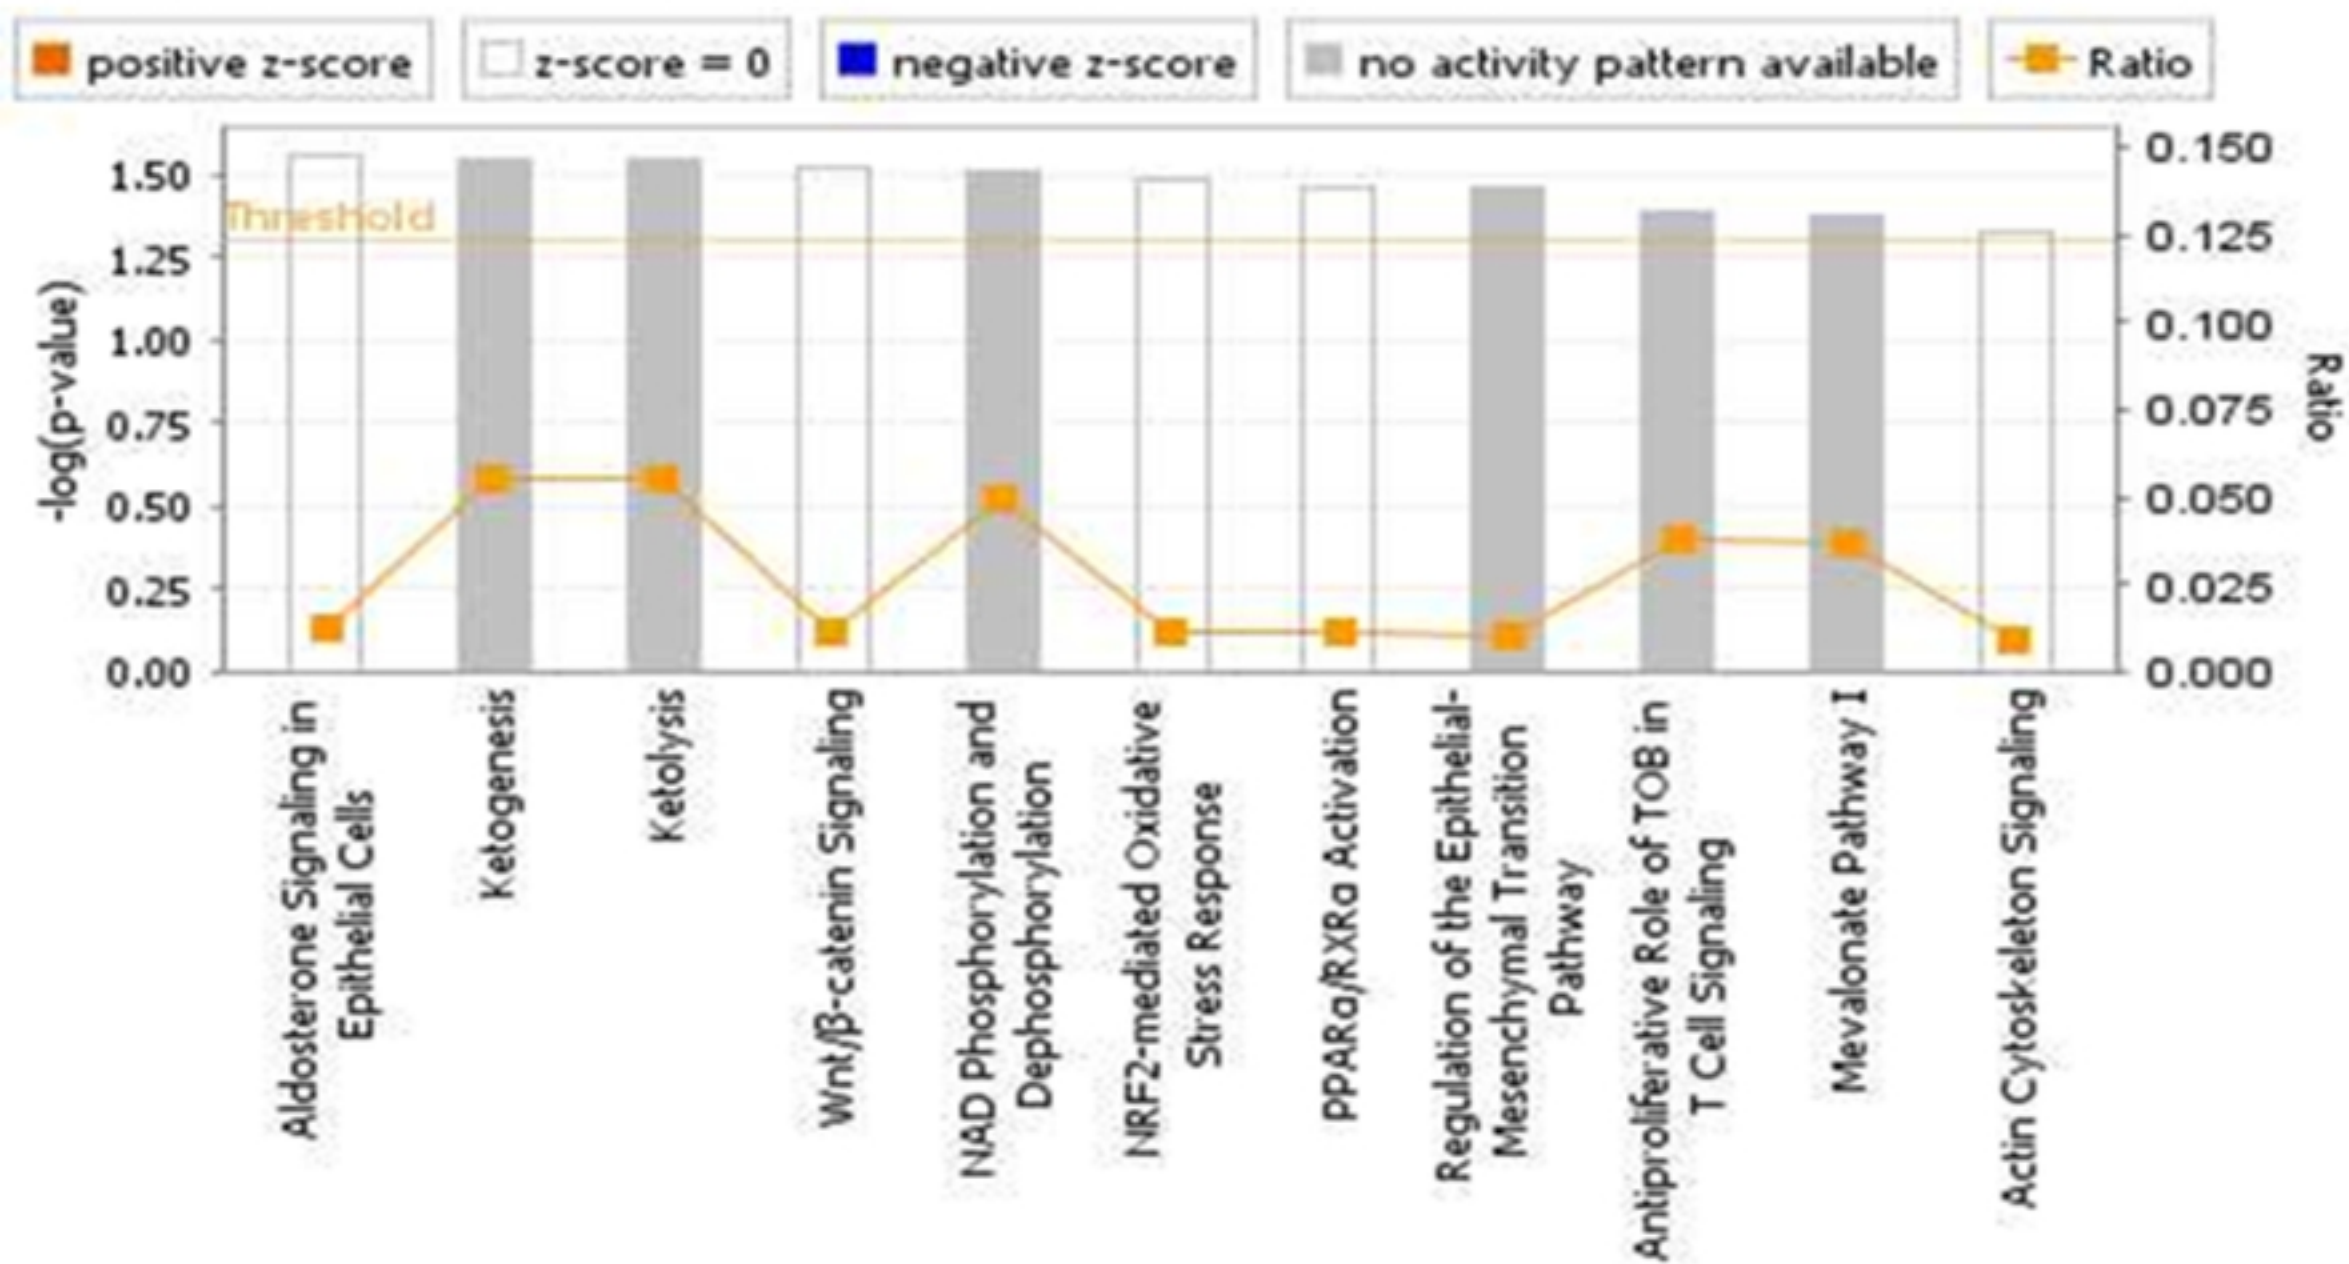

Figure 3

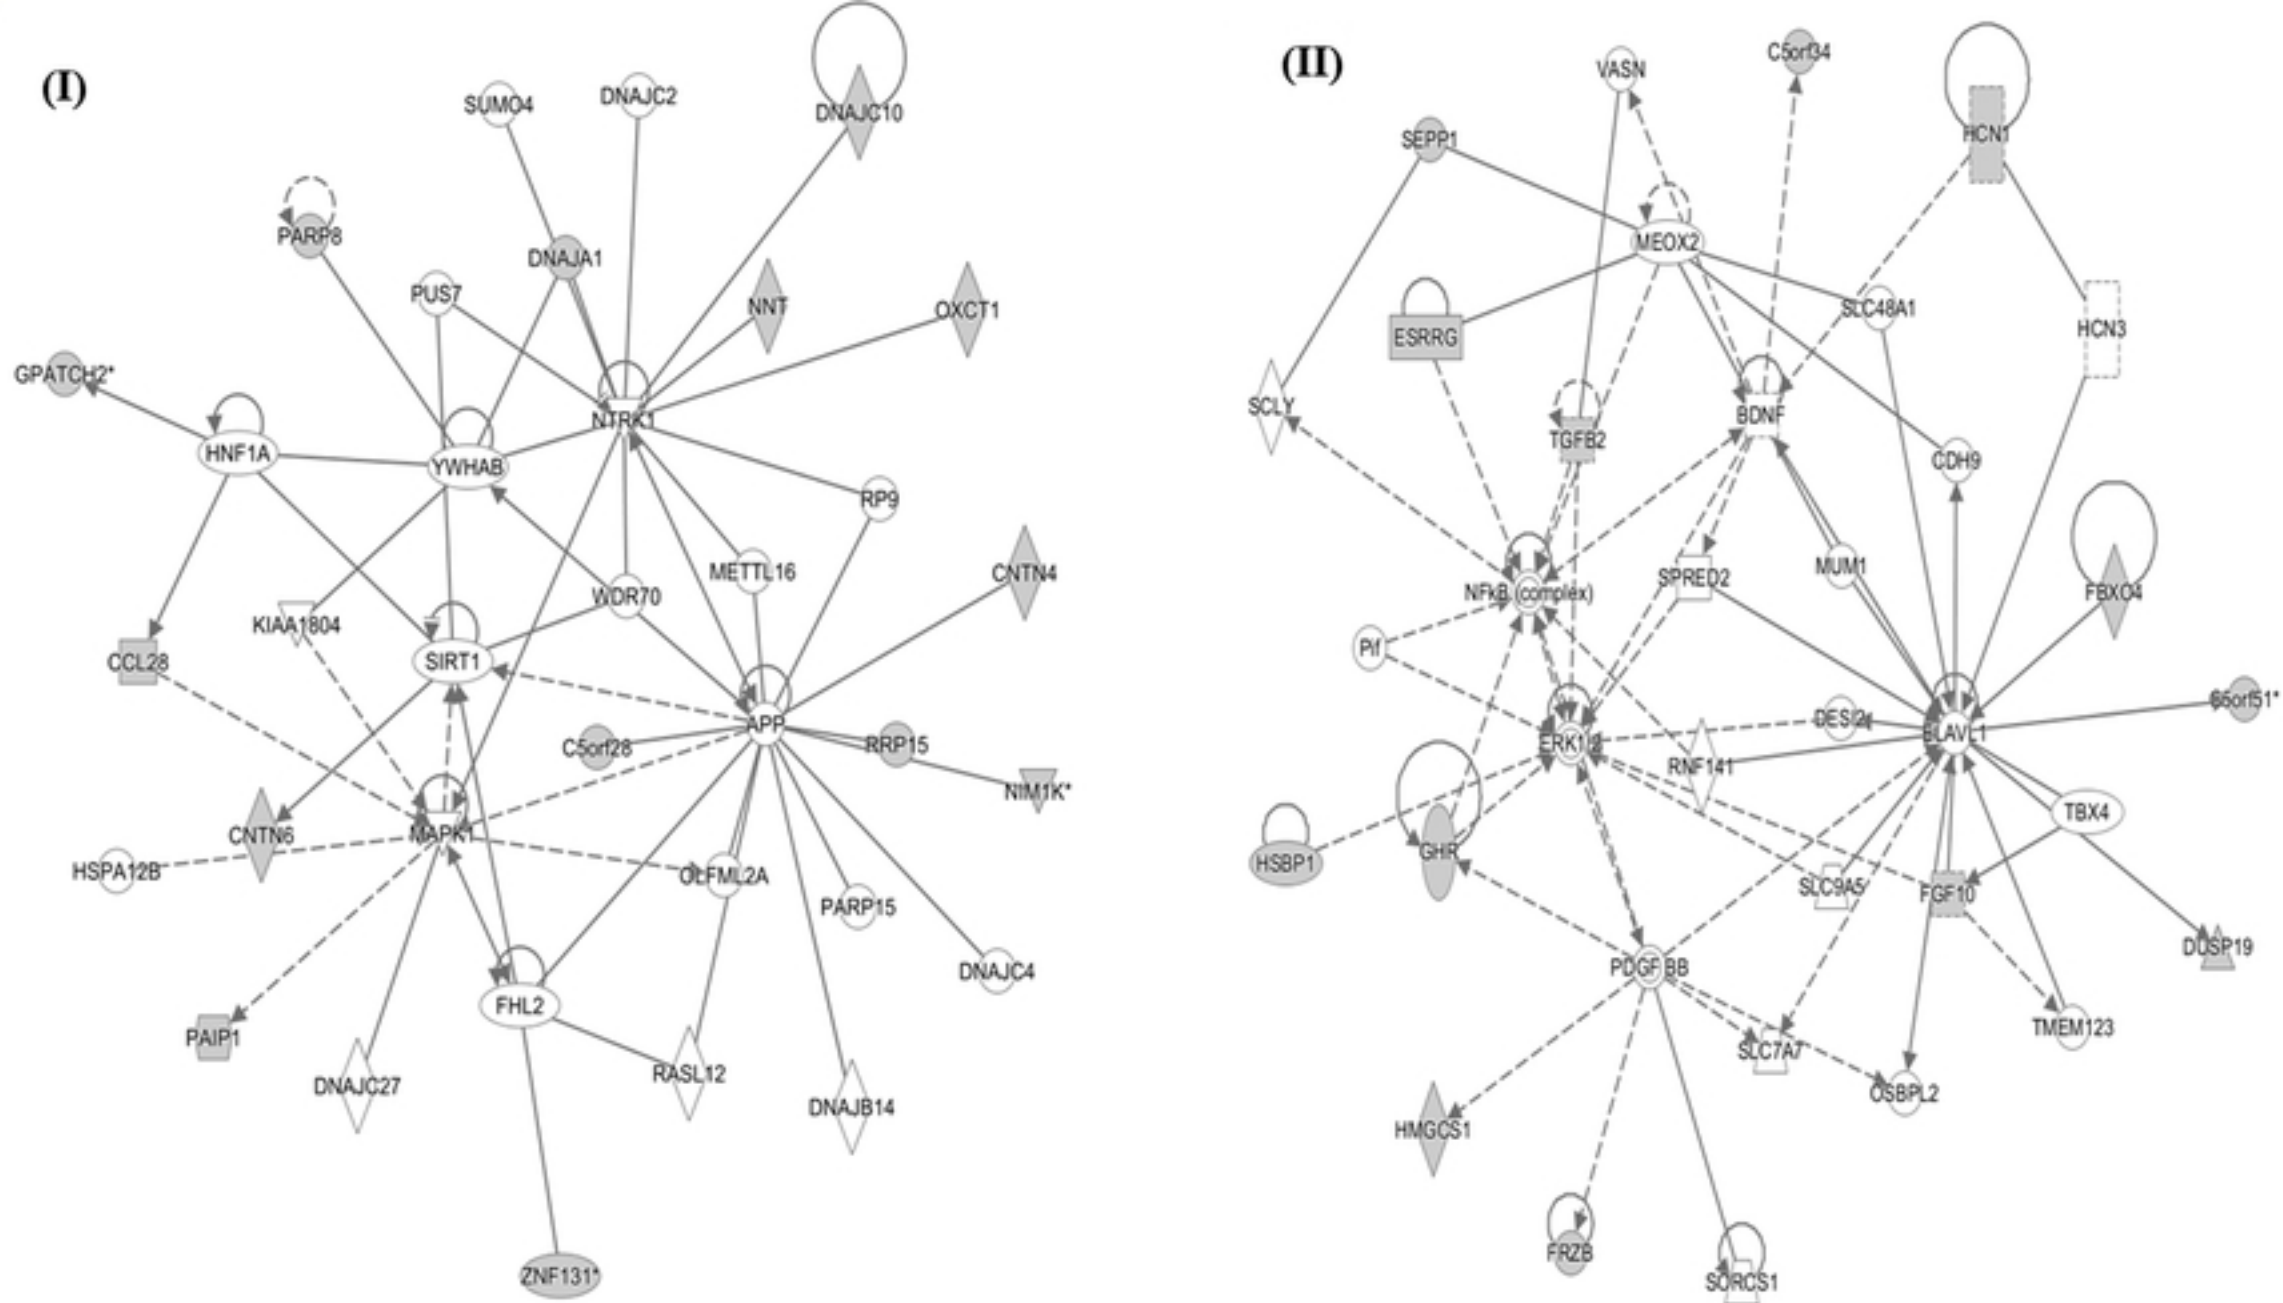

Figure 4
